1 Temporal changes in gut microbiota and signaling molecules of the gut–brain axis in mice fed  
2 meat protein diets

3

4 Yunting Xie,<sup>a</sup> Guanghong Zhou,<sup>a,b</sup> Chao Wang,<sup>a</sup> Xinglian Xu,<sup>a,b</sup> Chunbao Li<sup>a, b, c#</sup>

5

6 <sup>a</sup>Key Laboratory of Meat Processing and Quality Control, MOE; Jiangsu Collaborative

7 Innovation Center of Meat Production and Processing, Quality and Safety Control; Key

8 Laboratory of Meat Products Processing, MOA; Nanjing Agricultural University; Nanjing

9 210095, P.R. China

10 <sup>b</sup>Joint International Research Laboratory of Animal Health and Food Safety, MOE, Nanjing

11 Agricultural University; Nanjing 210095, P.R. China

12 <sup>c</sup>National Center for International Research on Animal Gut Nutrition, Nanjing Agricultural

13 University; Nanjing 210095, P.R. China

14

15 Running Head: diets alter gut microbiota and the gut-brain signaling.

16

17 #Address correspondence to Dr. Chunbao Li, [chunbao.li@njau.edu.cn](mailto:chunbao.li@njau.edu.cn)

18

19 242 word counts for the abstract and 4738 word counts for the text

20

21

## 22 Abstract

23 The purpose of this study was to characterize the dynamical changes of gut microbiota and  
24 explore the influence on bidirectional communications between the gut and the brain during a  
25 relatively long-term intake of different protein diets. The C57BL/6J mice were fed casein, soy  
26 protein and four kinds of processed meat proteins at a normal dose of 20% for 8 months. Protein  
27 diets dramatically affected the microbial composition and function and also the signaling  
28 molecule levels of the gut–brain axis in a dynamic manner, which consequently affected growth  
29 performance. *Alistipes*, Clostridiales vadinBB60, *Anaerotruncus*, *Blautia* and *Oscillibacter* had a  
30 relatively fast response to the diet, while Bacteroidales S24-7, *Ruminiclostridium*,  
31 *Ruminococcaceae* UCG-014, *Coriobacteriaceae* UCG-002 and *Bilophila* responded slowly.  
32 *Rikenellaceae* RC9 gut, *Faecalibaculum* and Lachnospiraceae showed a continuous change with  
33 feeding time. Bacteroidales S24-7 abundance increased from 4 months to 8 months, whereas  
34 those of *Rikenellaceae* RC9 gut, *Akkermansia*, *Alistipes* and *Anaerotruncus* remarkably decreased.  
35 Five and fifteen biological functions of microbiota were affected at 4 months and 8 months,  
36 respectively, and sixteen functions were observed to change over feeding time. Moreover, 28 and  
37 48 specific operational taxonomy units were associated with the regulation of serotonin, peptide  
38 YY, leptin and insulin levels at two time points. Ruminococcaceae was positively associated with  
39 Lachnospiraceae and negatively associated with Bacteroidales S24-7. These results give an  
40 important insight into the effect of gut microbiota on the bidirectional communications between  
41 the gut and the brain under a certain type of diet.

42

## 43 **Importance**

44 Many gastrointestinal and neuropsychiatric disorders may have a common pathophysiologic  
45 mechanism, involving bidirectional brain–gut axis signaling through humoral and neural  
46 pathways. The gut microbiota plays an important role in the communications between the gut  
47 and the brain. Recent evidence suggests that a growing number of subjects suffer from the above  
48 disorders. The significance of this study lies in the finding that long-term intake of different  
49 proteins at a normal dose induces dynamic alterations of specific microbiota in mice, which  
50 consequently affect bidirectional communications between the gut and the brain and results in  
51 different growth performance through dynamically regulating signaling molecule levels.  
52 Furthermore, this study indicates that intake of the same diet for a long time, irrespective of the  
53 diet source, may have an adverse effect on host health by altering gut microbiota.

54

55 **Keywords:** meat proteins, fecal microbiota, gut–brain axis, signaling molecules

56

## 57 **Introduction**

58 In recent years, the gut–brain axis has attracted great interest, and previous studies have  
59 shown that the gut microbiota plays an important role in the bidirectional communications  
60 between the gut and the brain, coined the microbiota–gut–brain axis (1). The brain ensures  
61 proper maintenance and coordination of gastrointestinal functions. In turn, the gut microbiota has  
62 a great influence on central nervous system activities and host behavior, with chemical signaling  
63 of the gut–brain axis being involved. The trillions of microbes in the gastrointestinal tract are

64 considered a complex and dynamic ecosystem that has coevolved with the host (2). Many factors  
65 have a certain impact on gut microbiota, e.g., genetics, geographic origin, age, medication and  
66 diet (3, 4), among which diet is the dominant modulator of the composition and function of gut  
67 microbiota (5). The majority of dietary proteins are digested into peptides and free amino acids  
68 in the small intestine, but some proteins cannot be digested and absorbed in the small intestine,  
69 so these enter the large intestine for microbial fermentation (6, 7). High-protein diets have been  
70 shown to alter the gut microbial composition (8, 9). The temporal microbial changes were also  
71 observed in feces after 6 weeks of a high-protein diet intake (10). Moreover, some studies  
72 indicated that dietary protein sources affect the gut microbial composition (11, 12).

73 Meat is known to be an important source of high-quality protein that contains all essential  
74 amino acids. In processed meat, the processing methods may lead to different degrees of protein  
75 oxidation and denaturation and hence cause protein aggregation and changes in secondary  
76 structures (13, 14). Moderate denaturation will increase the degradation of meat proteins, but  
77 various amino acid modifications might lead to the formation of “limit peptides,” which are not  
78 further broken down and thus result in a reduction of protein bioavailability (15, 16). Our *in vitro*  
79 studies showed that protein digestibility and digested products differed among cooked pork,  
80 emulsion-type sausage, dry-cured pork and stewed pork (17). Most studies have focused on the  
81 short-term effects of dietary proteins, and few data are available on the temporal variations in gut  
82 microbial composition. This study aimed to investigate whether a relatively long-term intake of  
83 proteins from processed meat affects the gut microbiota and the bidirectional communications  
84 between the gut and the brain.

## 85 **Results**

### 86 **Composition and functions of gut microbiota**

87 **Richness and diversity.** A total of 1801422 reads were obtained from all fecal samples with  
88 an average of 31059 reads per sample. Using the identification criterion of 97% sequence  
89 similarity at the species level, a total of 15741 operation taxonomy units (OTUs) were identified  
90 from all the samples, with an average of 271 OTUs per sample. The rarefaction and Shannon–  
91 Wiener curves tend to approach the saturation plateau and the Good’s coverage indices were  
92 greater than 99%, indicating sufficient data sampling and adequate sequencing depth.

93 Community richness estimators (Chao and ACE), and diversity indices (Shannon and  
94 Simpson) were calculated in order to evaluate the alpha diversity (Table 1). The protein diets  
95 significantly affected ACE and Chao values at both time points. The ACE and Chao values of the  
96 casein diet (CD) and stewed pork protein diet (SPPD) groups were significantly lower than those  
97 of other groups at 4 months, while the values were the highest for the soy protein diet (SPD)  
98 group at 8 months. The Shannon and Simpson values were not affected by diets at 4 months, but  
99 the Shannon value of the SPD group was higher than other groups at 8 months. In addition, the  
100 Shannon values decreased with feeding time, indicating that the microbial diversity may be  
101 reduced during long-term feeding of the same diet.

102 Principal coordinate analysis (PCoA) on the OTU level confirmed that the fecal microbiota in  
103 the CD, SPD and emulsion-type sausage protein diet (ESPD) was distinct from that in other meat  
104 protein diet groups at 4 months. Diet groups were also well separated at 8 months, except the  
105 cooked pork protein diet (CPPD) and SPPD groups. In addition, the fecal microbiota was well

106 separated between the two time points (Fig. 1A to C).

107 **Composition of gut microbiota.** On the phylum level, Bacteroidetes and Firmicutes were  
108 the predominant phyla (Fig. 2A and B). Hierarchical clustering analysis indicated that the SPD  
109 group was different from other groups at 4 months, but the dry-cured pork protein diet (DPPD)  
110 and CPPD groups revealed a significant difference from other groups at 8 months in microbial  
111 composition. Furthermore, Bacteroidetes abundance increased but Verrucomicrobia abundance  
112 markedly decreased during feeding (Fig. 2C).

113 On the genus level, Bacteroidales S24-7 was the most abundant genus at 4 months,  
114 accounting for 31.43% of the fecal microbial population, followed by *Rikenellaceae RC9 gut*  
115 (9.75%). At 8 months, Bacteroidales S24-7 and *Faecalibaculum* were the most prevalent genera,  
116 accounting for 44.88% and 9.81% of the total count in all diet groups, respectively (Fig. 2D and  
117 E). Moreover, seven species showed time-dependent changes. The abundance of Bacteroidales  
118 S24-7 increased from 4 to 8 months, whereas those of *Rikenellaceae RC9 gut*, *Akkermansia*,  
119 *Alistipes*, Clostridiales vadinBB60, *Clostridium sensu stricto 1* and *Anaerotruncus* were  
120 dramatically reduced (Fig. 2F).

121 Further analysis revealed that eight of the top twenty dominant genera had significantly  
122 changed after 4 and 8 months (Fig. 3A and B). At 4 months, the SPD group had lower abundance  
123 of *Rikenellaceae RC9 gut* than the CPPD, DPPD and CD groups, and lower abundance of  
124 *Faecalibaculum* than the ESPD and CPPD groups. However, the SPD group had higher  
125 abundance of Lachnospiraceae than the DPPD, ESPD and CPPD groups. The CD significantly  
126 decreased the abundances of *Alistipes* and Clostridiales vadinBB60 compared with other diets,

127 whereas it increased the abundances of *Blautia* and *Oscillibacter*. In the meat protein diet groups,  
128 *Anaerotruncus* was specifically higher in the SPPD group, with Clostridiales vadinBB60 having  
129 increased significantly in the DPPD group and *Faecalibaculum* in the ESPD group.

130 At 8 months, the CD group had lower abundance of Bacteroidales S24-7, *Bilophila* and  
131 *Ruminococcaceae UCG-014*, but higher *Rikenellaceae RC9 gut*, *Ruminiclostridium* and  
132 *Faecalibaculum* abundance than the CPPD, DPPD and SPPD groups. The SPD group had lower  
133 abundance of *Bilophila* but higher *Faecalibaculum* and Lachnospiraceae abundance than the  
134 SPPD, CPPD and DPPD groups. The abundance of *Coriobacteriaceae UCG-002* was the highest  
135 for the CPPD group, with *Faecalibaculum* specifically higher in the SPPD group, *Rikenellaceae*  
136 *RC9 gut* in the DPPD group and *Ruminiclostridium* in the ESPD group.

137 **Linear discriminant analysis of fecal microbiota.** Linear discriminant analysis effect size  
138 (LEfSe) analysis revealed 35 different OTUs among the six groups at 4 months (Fig. 4A).  
139 OTU36 (*Lachnospiraceae bacterium 609*), OTU23 (Bacteroidales S24-7) and OTU31  
140 (*Eubacterium coprostanoligenes*) were dominant in the CD group. OTU2 (*Faecalibaculum*) and  
141 OTU34 (*Coriobacteriaceae UCG-002*) were more abundant in the ESPD group, with OTU35  
142 (Clostridiales vadinBB60) and OTU40 (*Alistipes*) abundance higher in the DPPD group and  
143 OTU1 (*Rikenellaceae RC9 gut*) and OTU42 (*Anaeroplasma*) abundance higher in the CPPD  
144 group. The SPPD group was abundant in OTU21 (*Lachnospiraceae NK4A136*), OTU39  
145 (*Lachnospiraceae*) and OTU49 (*Clostridium scindens*), which all belong to the Lachnospiraceae  
146 family. Eight OTUs that represented the family Bacteroidales S24-7 were more abundant in the  
147 SPD group.

148 Nevertheless, 47 different OTUs were observed at 8 months (Fig. 4B). The CD group was  
149 enriched in two and five OTUs that represented the families of Rikenellaceae and  
150 Lachnospiraceae, respectively. OTU42 (*Alistipes*) and OTU83 (*Clostridium innocuum*) were  
151 more abundant in the DPPD group. OTU1 (Bacteroidales S24-7) and OTU3 (*Faecalibaculum*)  
152 were the most dominant in the ESPD and SPPD groups, respectively. Four OTUs that  
153 represented the family Bacteroidales S24-7 were more enriched in the CPPD group. Four, five  
154 and six OTUs that respectively represented the families of Bacteroidales S24-7, Lachnospiraceae  
155 and Ruminococcaceae were more abundant in the SPD group.

156 The time effect on the composition of microbiota is shown in Fig. 4C. A total of 25 OTUs  
157 were found to change over time. Seven of them obviously increased from 4 months to 8 months;  
158 these belong to the families of Bacteroidales S24-7 or Lachnospiraceae or the *Coriobacteriaceae*  
159 *UCG-002* genus. The abundances of five and three OTUs that respectively belong to the families  
160 of Ruminococcaceae and Rikenellaceae had significantly reduced. Moreover, three OTUs that  
161 represented the genera *Odoribacter*, *Akkermansia* and *Bilophila* were also distinctly decreased  
162 over feeding time.

163 **Functional prediction of microbial genes.** The Phylogenetic Investigation of Communities  
164 by Reconstruction of Unobserved States (PICRUSt) revealed five differential functions at 4  
165 months, which are associated with carbohydrate metabolism, the endocrine system,  
166 neurodegenerative diseases, cancer and the nervous system (Fig. 5A). The ESPD diet  
167 upregulated carbohydrate metabolism and nervous system function more than the CD, SPD and  
168 SPPD groups, and the meat protein and casein diets caused a downregulation of genes involved



169 in the endocrine system and neurodegenerative diseases compared with the soy protein diet.

170 At 8 months, 15 gene functions were found to be differentially regulated (Fig. 5B).

171 Compared with the CD group, the SPPD, CPPD and DPPD groups showed a significant

172 reduction in the expression of genes involved in signal transduction, xenobiotics biodegradation

173 and metabolism, while genes involved in carbohydrate metabolism, replication and repair,

174 translation, nucleotide metabolism, enzyme families, the nervous system and the immune system

175 were upregulated. The cellular processes and signaling were significantly downregulated in the

176 SPPD and CPPD groups. In addition, the signaling molecules and interaction were significantly

177 upregulated in the SPPD, CPPD and DPPD groups compared to the SPD group.

178 In addition, 16 microbial functions were significantly changed during feeding (Fig. 5C).

179 Functions of transcription, cellular processes and signaling, signal transduction, xenobiotics

180 biodegradation, genetic information processing and metabolism were remarkably downregulated.

181 Functions of the immune system, the digestive system, metabolic diseases, cell growth and death,

182 enzyme families, metabolism of other amino acids, transport and catabolism, nucleotide

183 metabolism, energy metabolism and translation were upregulated. This indicates that the

184 diet-induced changes of microbial biological functions are related to the bidirectional

185 communications between the gut microbiota and the host.

### 186 **Variations in signaling molecules of the gut–brain axis**

187 To further explore the effects of protein diets on bidirectional communications between the

188 gut and the brain via the peripheral circulatory system, signaling molecules, e.g., peptide YY

189 (PYY), leptin, insulin and serotonin, in serum were quantified. The protein diets significantly

190 affected the concentrations of serotonin, PYY, leptin and insulin in serum at the two time points  
191 (Fig. 6A and B).

192 At 4 months, the concentration of serotonin in the meat protein diet groups was dramatically  
193 higher than that in the SPD group, but lower than that in the CD group. Among the meat protein  
194 diet groups, the concentration of serotonin was remarkably higher in the CPPD and SPPD groups  
195 than in the DPPD group. Nevertheless, the DPPD group had the highest concentration of PYY.  
196 On the other hand, the leptin and insulin levels were lower in SPPD group than in the DPPD and  
197 SPD groups but did not differ from those in the CD group.

198 At 8 months, the meat protein diet groups had higher serotonin levels compared with the CD  
199 group, and serotonin levels in the CPPD group were lower than in the SPD, ESPD and DPPD  
200 groups. As regards PYY, its concentration in the meat protein diet groups was lower than that in  
201 the CD group, but higher than that in the SPD group. For meat protein diet groups, the  
202 concentration of PYY in the ESPD group was significantly lower than that in the CPPD group.  
203 The leptin and insulin levels were lower in the DPPD group than in the SPPD and SPD groups  
204 but higher than in the CD group. This indicates that diet-induced changes of gut microbiota could  
205 have associations with alterations in signaling molecule levels of the gut–brain axis.

#### 206 **Key species associated with signaling molecules of the gut–brain axis**

207 To evaluate potential associations between gut microbiota and the signaling molecules of the  
208 gut–brain axis, Spearson correlation analysis was performed with dominant OTUs whose relative  
209 abundance was at least 0.5% in at least one group. We observed that 28 and 48 OTUs were  
210 apparently correlated with signaling molecules including serotonin, PYY, leptin and insulin at 4

211 and 8 months, respectively (Fig. 7A and B).

212 At 4 months, four and two OTUs that represented the families Lachnospiraceae and  
213 Bacteroidales S24-7, respectively, were positively correlated with the concentration of serotonin.  
214 However, each of the two OTUs that respectively represented the genus *Lachnospiraceae*  
215 *NK4A136* and the family Bacteroidales S24-7 were all negatively correlated with serotonin levels.  
216 Both leptin and insulin levels were positively correlated with six OTUs that represented the  
217 family Bacteroidales S24-7, but they were negatively correlated with two OTUs that represented  
218 the family Lachnospiraceae. Finally, PYY levels showed a positive statistical relationship with  
219 OTU49 (*Clostridium scindens*) and OTU241 (*Lachnospiraceae NK4A136*), which all belong to  
220 the family Lachnospiraceae.

221 At 8 months, OTU1 and OTU31 (Bacteroidales S24-7) and OTU42 (*Alistipes*) were  
222 positively correlated with serotonin levels. On the contrary, each of the three OTUs that  
223 respectively represented the families Lachnospiraceae and Bacteroidales S24-7 showed a  
224 negative correlation with the serotonin levels. Eight OTUs in the families of Bacteroidales S24-7  
225 had a positive correlation with PYY levels, and four OTUs that represented the families of  
226 Lachnospiraceae revealed a negative correlation with serotonin levels. The insulin and leptin  
227 levels showed a positive correlation with seven and four OTUs, respectively, which all belong to  
228 the Bacteroidales S24-7 family. Each of the three OTUs that represented the families of  
229 Lachnospiraceae and Ruminococcaceae were also positively correlated with the insulin and  
230 leptin levels. Nevertheless, these levels were negatively correlated with OTU2 (*Rikenellaceae*  
231 *RC9 gut*), OTU15 (*Mucispirillum*) and OTU35 (*Bilophila*).

232 The microbial network analysis of 4-month data indicated nine positive correlations (green  
233 lines) and seven negative correlations (red lines) on the OTU level (Fig. 8A). For 8-month data,  
234 47 positive correlations (green lines) and 22 negative correlations (red lines) were observed. (Fig.  
235 8B). *Bilophila* was positively correlated with *Mucispirillum*, Lachnospiraceae and  
236 Ruminococcaceae, as was Ruminococcaceae with Lachnospiraceae and *Mucispirillum*; they all  
237 showed a negative relationship with Bacteroidales S24-7. However, Bacteroidales S24-7 was  
238 positively correlated with Erysipelotrichaceae and Rikenellaceae.

### 239 **Growth performance**

240 At the baseline (before diet intervention), no significant difference was observed in body  
241 weight between any two diet groups. However, the protein diets had a significant impact on the  
242 body weight of the mice (Fig. 9A). The body weight of mice in the CPPD, SPPD and ESPD  
243 groups increased with feeding time, while the CD induced a great decline in body weight at the  
244 24th week of the experiment. A similar phenomenon was observed in the SPD and DPPD groups  
245 at the 30th week of the experiment. At the end of the diet, the body weight of the SPPD group  
246 was significantly lower than that of the SPD group, but higher than that of the CD group, which  
247 was in line with the average daily gain (ADG). Correspondingly, the average daily feed intake  
248 and the feed efficiency were the lowest for the CD group. The average daily feed intake (ADFI)  
249 of the SPD group was higher than that of the SPPD group, but no significant difference was  
250 observed for feed efficiency (Fig. 9B to D).

251 The development of epididymal adipose tissue and of the liver can reflect, to a certain extent,  
252 the body composition of mice as a response to their diet. The protein diets had a distinct impact

253 on the weight of the epididymal adipose tissue and liver (Fig. 9E to H). The non-meat protein  
254 diet groups (CD and SPD) had less epididymal adipose than the meat protein diet groups (ESPD,  
255 DPPD, SPPD and CPPD). Nevertheless, the liver weights of the meat protein diet groups were  
256 lower than those in the SPD group but higher than those in the CD group. This may be related to  
257 feed intake and weight gain.

258

## 259 **Discussion**

260 The gut is a complex and dynamic ecosystem. The temporal pattern of microbial survival is  
261 the key for finding out core members responding to environmental changes. Many studies have  
262 shown that the composition of fecal microbiota is highly correlated with the colonic lumen and  
263 mucosa and moderately correlated with the distal small intestine (18). Our previous studies  
264 indicated that intake of soy protein, casein and meat proteins altered the composition of cecal  
265 microbes in rats (19). In the present study, the diet-induced and temporal changes of microbiota  
266 in mice have been analyzed and correlated with signaling molecules of the gut–brain axis.

267 Obviously, the different protein diets led to different microbial compositions, which may be  
268 due to the different digestibility and digested products of processed meat proteins (17) from  
269 those of non-meat proteins. It is noteworthy that the responses of gut microbiota to the diet differ  
270 between bacterial species; some species responded faster or slower than others to the protein diet.

271 The microbial structure can be easily affected by the host's physiological status and by  
272 environmental perturbations. However, microbial structure remains stable during development  
273 (20). Environmental factors, including diet, may drive them to a new homeostasis. For each

274 genus of which the abundance is affected by the protein diets, all protein diets in this study either  
275 increased or decreased its abundance. Similar results have been shown in a short-term, high-fat  
276 diet feeding study (10). As is well known, *Akkermansia* is a mucin-dependent bacterium (21) that  
277 can stimulate the synthesis and secretion of mucin, which is the main component of the mucus  
278 layer and acts as a mucus barrier (22). *Akkermansia* was considered to be a vital biomarker for  
279 intestinal health (23) and to aid in the prevention of obesity, diabetes, inflammation and other  
280 metabolic disorders (24). Notably, *Akkermansia* was not significantly affected by protein diets at  
281 the two time points. However, the abundance of *Akkermansia* was reduced from 4 months to 8  
282 months in the present study. In addition, the Shannon diversity index was also significantly  
283 reduced with feeding time. Long-term intake of a certain diet may lead to decreased microbial  
284 diversity and to destruction of the ecological balance of gut microbiota. Many studies have  
285 shown that low microbial diversity is associated with some metabolic disorders (25, 26). Our  
286 microbial network analysis has indicated that 16 and 69 microbial interactions existed in the two  
287 time points, respectively. Ruminococcaceae was positively associated with Lachnospiraceae but  
288 negatively with Bacteroidales S24-7, which can partly explain the decline in Ruminococcaceae  
289 and Lachnospiraceae and the increase in Bacteroidales S24-7.

290 Dietary modulation can alter the microbial community and metabolic activity (27, 28).  
291 Previous studies showed that many members of the Rikenellaceae, Lachnospiraceae and  
292 Ruminococcaceae families show a high potential for fermenting dietary proteins (29-31).  
293 Short-chain fatty acids (SCFAs) are important microbial metabolites that serve as important  
294 nutrients for the gut epithelium and body tissues that can affect the metabolism, immune

295 response and anti-inflammatory function (32, 33). High-protein diets have been shown to affect  
296 the production of SCFAs both in human and in rodent models (34, 35). Ruminococcaceae and  
297 *Bifidobacterium* are known to be acetate producers. Many members of Lachnospiraceae are  
298 capable of producing butyric acid through the fermentation of various substrates (29). In the  
299 present study, different protein diets have altered the numbers of SCFA producers. We  
300 hypothesize that different dietary proteins affect the levels of SCFAs by changing the  
301 composition of the gut microbiota. Some studies showed that SCFAs may affect the production  
302 of hormones and neurotransmitters (36, 37). The host–microbe fundamental relationship relies on  
303 chemical signaling and nutrient availability (38). Twenty-eight and forty-eight specific OTUs  
304 were identified to have distinct correlations with serotonin, PYY, leptin and insulin at 4 and 8  
305 months, respectively. These hormones and neurotransmitters play important roles in the  
306 communication between the gut and the brain, especially in terms of appetite and energy balance  
307 (39, 40).

308       Precise regulation of appetite contributes to maintenance of the body’s stable energy  
309 metabolism and weight level. Many studies also showed that the gut microbial composition is  
310 linked to body weight and average daily gain (41), and that the production of SCFAs can  
311 improve the absorptive capacity of the intestine and increase feed efficiency (42). Soy protein  
312 isolates were used in obese mice to reduce fat deposition. Similarly, in our study, the non-meat  
313 protein diet-fed mice (CD and SPD) had less epididymal adipose tissue than mice fed the meat  
314 protein diets (ESPD, DPPD, SPPD and CPPD), even though mice in the SPD group had higher  
315 body weights than those in the meat protein diet groups. The liver weights of mice in the meat

316 protein diet groups were lower than in the SPD group but higher than in the CD group; the  
317 relative differences are similar to the change in intake and weight gain of the mice. Furthermore,  
318 the growth rate of mice fed different protein diets tended to be slow, and even decreased over the  
319 feeding period. The growth rates were different from previous studies using a rat model (43),  
320 which may be related to the physiological performance of the animals themselves and the time of  
321 dietary intervention.

322 Above all, our results show that specific microbiota dynamically regulate signaling molecule  
323 levels, consequently affecting growth performance, suggesting that consuming the same diet for  
324 a prolonged time, irrespective of the kind of diet, may adversely affect our health to some extent  
325 by altering the microbial composition. Although these results from animal experiments cannot be  
326 extrapolated directly to humans, they do provide some evidence and references the composition  
327 of a healthy human diet. A healthy diet may help us improve not only gastrointestinal diseases  
328 but also other health problems, such as nervous system-related disorders, by regulating the  
329 microbial structure and balance. The exact mechanisms remain unclear; more studies are  
330 necessary to investigate how diets stably improve health status through re-shaping the gut  
331 microbiota composition in the long term.

332

## 333 **Materials and Methods**

334 **Animals and diets.** All experiments were carried out in compliance with the relevant  
335 guidelines and regulations of the Ethical Committee of Experimental Animal Center of Nanjing  
336 Agricultural University. A total of 60 4-week-old male C57BL/6J mice were obtained from



337 Nanjing Biomedical Research Institute and housed in a specific pathogen-free animal center  
338 (SYXK<Jiangsu> 2011-0037). The temperature ( $20.0 \pm 0.5^{\circ}\text{C}$ ) and relative humidity ( $60 \pm 10\%$ )  
339 were kept constant during the experiment, with a 12-h light cycle. Mice were fed a standard  
340 chow diet during a 2-week acclimation period. Then, animals were assigned to one of six diet  
341 groups (ten mice in each group and two per cage), i.e., CD, ESPD, DPPD, SPPD, CPPD and  
342 SPD groups. Mice were allowed to access water and diets *ad libitum* for 8 months. Body weights  
343 and feed intake of mice were routinely recorded for calculating the ADG and the ADFI. The feed  
344 efficiency was expressed as a ratio of ADG to ADFI.

345 **Sample collection.** After 4 and 8 months of feeding, the feces and blood of mice were  
346 collected. The fecal samples from the two mice in the same cages were mixed and stored at  
347  $-80^{\circ}\text{C}$  for the microbial composition analysis. Blood samples were centrifuged at 12,000 g for  
348 30 min to pellet the blood cells and serum samples were stored at  $-80^{\circ}\text{C}$ . After 8 months, all the  
349 mice were euthanized by cervical dislocation, and the epididymal adipose and liver tissues were  
350 taken and weighed. Relative weights of epididymal adipose and liver tissues were calculated  
351 according to body weight.

352 **Serum signaling molecules of the gut–brain axis.** The serum signaling molecules of the  
353 gut–brain axis, including peptide YY (PYY), leptin and insulin, were measured using the  
354 Milliplex magnetic bead mouse metabolic hormone multiplex panel (MMHMAG-44K;  
355 EMD-Millipore, Billerica MA), and serotonin (5-hydroxytryptamine, 5-HT) was quantified using  
356 a serotonin ELISA kit (KA2518, Abnova, USA) according to the manufacturer’s protocols.

357 **16S rRNA gene sequencing.** Total genomic DNA in fecal samples was extracted using the

358 QIAamp DNA Stool Mini Kit (No. 51504, Qiagen, Germany) according to the manufacturer's  
359 instructions. The DNA was quantified by a Nanodrop® spectrophotometer (Nanodrop2000,  
360 Thermo, USA, Shanghai). Purified DNA was used to amplify the V4 region of 16S rRNA, which  
361 is associated with the lowest taxonomic assignment error rate (44). Polymerase chain reaction  
362 (PCR) was performed in triplicate. Amplicons were extracted, purified and quantified. The  
363 pooled DNA product was used to construct Illumina Pair-End library following Illumina's  
364 genomic DNA library preparation procedure. Then the amplicon library was paired-end  
365 sequenced ( $2 \times 250$ ) on an IlluminaMiSeq platform (Shanghai Biozeron Co., Ltd) according to  
366 the standard protocols.

367 **Bioinformatics analysis.** Raw fastq files were trimmed and chimeric sequences were  
368 identified and removed from all samples to reduce noise, and operational taxonomic units (OTUs)  
369 were clustered with  $\geq 97\%$  similarity. In line with the results of the OTU clustering analysis, we  
370 can define the relative abundance of each OTU at different taxonomic levels and carry out a  
371 variety of diversity index analyses. Community richness estimator (Chao and ACE), diversity  
372 indices (Shannon and Simpson), and Good's coverage were calculated (45). Principal coordinate  
373 analysis (PCoA) and clustering analysis were applied on the basis of the OTUs to offer an  
374 overview of the fecal microbial composition (46). Multivariate analysis of variance (MANOVA)  
375 analysis was conducted to further confirm the observed differences. LEfSe analysis was carried  
376 out to discover biomarkers for fecal bacteria and to distinguish between biological conditions  
377 among different groups (47). Besides, the Spearman correlation coefficients were assessed to  
378 determine the relationships between microbiota and signaling molecules of the gut–brain axis.

379       **Functional prediction of the microbial genes.** PICRUSt program based on the Kyoto  
380 Encyclopedia of Genes and Genomes (KEGG) database was used to predict the functional  
381 alteration of fecal microbiota in different samples (48). The OTU data obtained were used to  
382 generate BIOM files formatted as input for PICRUSt v1.1.09 with the make.biom script usable in  
383 the Mothur. OTU abundances were mapped to Greengenes OTU IDs as input to speculate about  
384 the functional alteration of microbiota.

385       **Statistical analysis.** The diet effect was evaluated by one-way ANOVA with SAS software  
386 (SAS Institute Inc., Cary, NC, USA). Means were compared and the significance threshold was  
387 set at 0.05 for statistical analyses. Figures were constructed using the GraphPad Prism (version  
388 5.0.3, San Diego, CA, USA).

389       The details are described in supplementary file, DOCX file, 40.7 KB.

390

## 391 **Acknowledgements**

392       This study was financially supported by grants from National Natural Science Foundation of  
393 China (No. 31530054). We would like to thank Jiangsu Department of Education (PAPD) for  
394 support and LetPub ([www.letpub.com](http://www.letpub.com)) for providing linguistic assistance during the preparation  
395 of this manuscript.

396

## 397 **References**

398 1.       Rhee SH, Pothoulakis C, Mayer EA. 2009. Principles and clinical implications of the  
399 brain-gut-enteric microbiota axis. *Nat Rev Gastroenterol Hepatol* 6:306-14.

- 400 2. Li J, Jia H, Cai X, Zhong H, Feng Q, Sunagawa S, Arumugam M, Kultima JR, Prifti E,  
401 Nielsen T, Juncker AS, Manichanh C, Chen B, Zhang W, Levenez F, Wang J, Xu X, Xiao  
402 L, Liang S, Zhang D, Zhang Z, Chen W, Zhao H, Al-Aama JY, Edris S, Yang H, Wang J,  
403 Hansen T, Nielsen HB, Brunak S, Kristiansen K, Guarner F, Pedersen O, Dore J, Ehrlich  
404 SD, Meta HITC, Bork P, Wang J, Meta HITC. 2014. An integrated catalog of reference  
405 genes in the human gut microbiome. *Nat Biotechnol* 32:834-41.
- 406 3. De Filippo C, Cavalieri D, Di Paola M, Ramazzotti M, Poullet JB, Massart S, Collini S,  
407 Pieraccini G, Lionetti P. 2010. Impact of diet in shaping gut microbiota revealed by a  
408 comparative study in children from Europe and rural Africa. *Proc Natl Acad Sci U S A*  
409 107:14691-6.
- 410 4. Escobar JS, Klotz B, Valdes BE, Agudelo GM. 2014. The gut microbiota of Colombians  
411 differs from that of Americans, Europeans and Asians. *BMC Microbiol* 14:311.
- 412 5. David LA, Maurice CF, Carmody RN, Gootenberg DB, Button JE, Wolfe BE, Ling AV,  
413 Devlin AS, Varma Y, Fischbach MA, Biddinger SB, Dutton RJ, Turnbaugh PJ. 2014. Diet  
414 rapidly and reproducibly alters the human gut microbiome. *Nature* 505:559-63.
- 415 6. Blachier F, Mariotti F, Huneau JF, Tome D. 2007. Effects of amino acid-derived luminal  
416 metabolites on the colonic epithelium and physiopathological consequences. *Amino*  
417 *Acids* 33:547-62.
- 418 7. Walker AW, Duncan SH, McWilliam Leitch EC, Child MW, Flint HJ. 2005. pH and  
419 peptide supply can radically alter bacterial populations and short-chain fatty acid ratios  
420 within microbial communities from the human colon. *Appl Environ Microbiol*

- 421 71:3692-700.
- 422 8. Kiilerich P, Myrmet LS, Fjaere E, Hao Q, Hugenholtz F, Sonne SB, Derrien M, Pedersen  
423 LM, Petersen RK, Mortensen A, Licht TR, Romer MU, Vogel UB, Waagbo LJ,  
424 Giallourou N, Feng Q, Xiao L, Liu C, Liaset B, Kleerebezem M, Wang J, Madsen L,  
425 Kristiansen K. 2016. Effect of a long-term high-protein diet on survival, obesity  
426 development, and gut microbiota in mice. *Am J Physiol Endocrinol Metab* 310:E886-99.
- 427 9. Liu X, Blouin JM, Santacruz A, Lan A, Andriamihaja M, Wilkanowicz S, Benetti PH,  
428 Tome D, Sanz Y, Blachier F, Davila AM. 2014. High-protein diet modifies colonic  
429 microbiota and luminal environment but not colonocyte metabolism in the rat model: the  
430 increased luminal bulk connection. *Am J Physiol Gastrointest Liver Physiol*  
431 307:G459-70.
- 432 10. Mu C, Yang Y, Luo Z, Zhu W. 2017. Temporal microbiota changes of high-protein diet  
433 intake in a rat model. *Anaerobe* 47:218-225.
- 434 11. Qi H, Xiang Z, Han G, Yu B, Huang Z, Chen D. 2011. Effects of different dietary protein  
435 sources on cecal microflora in rats. *African Journal of Biotechnology* 10:3704-3708.
- 436 12. Rist VT, Weiss E, Sauer N, Mosenthin R, Eklund M. 2014. Effect of dietary protein  
437 supply originating from soybean meal or casein on the intestinal microbiota of piglets.  
438 *Anaerobe* 25:72-9.
- 439 13. Ishiwatari N, Fukuoka M, Sakai N. 2013. Effect of protein denaturation degree on texture  
440 and water state of cooked meat. *Journal of Food Engineering* 117:361-369.
- 441 14. Traore S, Aubry L, Gatellier P, Przybylski W, Jaworska D, Kajak-Siemaszko K,

- 442 Sante-Lhoutellier V. 2012. Effect of heat treatment on protein oxidation in pig meat. Meat  
443 Sci 91:14-21.
- 444 15. Kaur L, Maudens E, Haisman DR, Boland MJ, Singh H. 2014. Microstructure and protein  
445 digestibility of beef: the effect of cooking conditions as used in stews and curries. LWT -  
446 Food Science and Technology 55:612-620.
- 447 16. Sayd T, Chambon C, Santé-Lhoutellier V. 2016. Quantification of peptides released  
448 during in vitro digestion of cooked meat. Food Chemistry 197:1311-1323.
- 449 17. Li L, Liu Y, Zou X, He J, Xu X, Zhou G, Li C. 2017. *In vitro* protein digestibility of pork  
450 products is affected by the method of processing. Food Res Int 92:88-94.
- 451 18. Yasuda K, Oh K, Ren B, Tickle TL, Franzosa EA, Wachtman LM, Miller AD,  
452 Westmoreland SV, Mansfield KG, Vallender EJ, Miller GM, Rowlett JK, Gevers D,  
453 Huttenhower C, Morgan XC. 2015. Biogeography of the intestinal mucosal and luminal  
454 microbiome in the rhesus macaque. Cell Host Microbe 17:385-91.
- 455 19. Zhu Y, Lin X, Zhao F, Shi X, Li H, Li Y, Zhu W, Xu X, Li C, Zhou G. 2015. Meat, dairy  
456 and plant proteins alter bacterial composition of rat gut bacteria. Sci Rep 5:15220.
- 457 20. Faust K, Lahti L, Gonze D, de Vos WM, Raes J. 2015. Metagenomics meets time series  
458 analysis: unraveling microbial community dynamics. Curr Opin Microbiol 25:56-66.
- 459 21. Derrien M, Belzer C, de Vos WM. 2017. *Akkermansia muciniphila* and its role in  
460 regulating host functions. Microb Pathog 106:171-181.
- 461 22. Everard A, Belzer C, Geurts L, Ouwerkerk JP, Druart C, Bindels LB, Guiot Y, Derrien M,  
462 Muccioli GG, Delzenne NM. 2013. Cross-talk between *Akkermansia muciniphila* and

- 463 intestinal epithelium controls diet-induced obesity. Proceedings of the National Academy  
464 of Science 110:9066.
- 465 23. Belzer C, de Vos WM. 2012. Microbes inside--from diversity to function: the case of  
466 *Akkermansia*. ISME J 6:1449-58.
- 467 24. Swidsinski A, Loening-Baucke V, Herber A. 2009. Mucosal flora in Crohn's disease and  
468 ulcerative colitis - an overview. J Physiol Pharmacol 60 Suppl 6:61-71.
- 469 25. Gao R, Zhu C, Li H, Yin M, Pan C, Huang L, Kong C, Wang X, Zhang Y, Qu S, Qin H.  
470 2018. Dysbiosis signatures of gut microbiota along the sequence from healthy, young  
471 patients to those with overweight and obesity. Obesity (Silver Spring) 26:351-361.
- 472 26. Panasevich M, Wankhade U, Chintapalli S, Shankar K, Rector R. 2018. Cecal versus  
473 fecal microbiota in ossabaw swine and implications for obesity. Physiol Genomics.
- 474 27. Keightley PC, Koloski NA, Talley NJ. 2015. Pathways in gut-brain communication:  
475 evidence for distinct gut-to-brain and brain-to-gut syndromes. Aust N Z J Psychiatry  
476 49:207-14.
- 477 28. Walsh CJ, Guinane CM, O'Toole PW, Cotter PD. 2014. Beneficial modulation of the gut  
478 microbiota. FEBS Lett 588:4120-30.
- 479 29. Meehan CJ, Beiko RG. 2014. A phylogenomic view of ecological specialization in the  
480 Lachnospiraceae, a family of digestive tract-associated bacteria. Genome Biol Evol  
481 6:703-13.
- 482 30. Su XL, Tian Q, Zhang J, Yuan XZ, Shi XS, Guo RB, Qiu YL. 2014. *Acetobacteroides*  
483 *hydrogenigenes* gen. nov., sp. nov., an anaerobic hydrogen-producing bacterium in the

- 484 family Rikenellaceae isolated from a reed swamp. *Int J Syst Evol Microbiol* 64:2986-91.
- 485 31. Israeli-Ruimy V, Bule P, Jindou S, Dassa B, Morais S, Borovok I, Barak Y, Slutzki M,  
486 Hamberg Y, Cardoso V, Alves VD, Najmudin S, White BA, Flint HJ, Gilbert HJ, Lamed  
487 R, Fontes CM, Bayer EA. 2017. Complexity of the *Ruminococcus flavefaciens* FD-1  
488 cellulosome reflects an expansion of family-related protein-protein interactions. *Sci Rep*  
489 7:42355.
- 490 32. Levy M, Blacher E, Elinav E. 2017. Microbiome, metabolites and host immunity. *Curr*  
491 *Opin Microbiol* 35:8-15.
- 492 33. Smith P, Howitt M, Panikov N, Michaud M, Gallini C, Bohlooly-Y M, Glickman J,  
493 Garrett W. 2013. The microbial metabolites, short-chain fatty acids, regulate colonic Treg  
494 cell homeostasis. *Science* 341:569-73.
- 495 34. Duncan SH, Belenguer A, Holtrop G, Johnstone AM, Flint HJ, Lobley GE. 2007.  
496 Reduced dietary intake of carbohydrates by obese subjects results in decreased  
497 concentrations of butyrate and butyrate-producing bacteria in feces. *Appl Environ*  
498 *Microbiol* 73:1073-8.
- 499 35. Mu C, Yang Y, Luo Z, Guan L, Zhu W. 2016. The colonic microbiome and epithelial  
500 transcriptome are altered in rats fed a high-protein diet compared with a normal-protein  
501 diet. *J Nutr* 146:474-83.
- 502 36. Yano JM, Yu K, Donaldson GP, Shastri GG, Ann P, Ma L, Nagler CR, Ismagilov RF,  
503 Mazmanian SK, Hsiao EY. 2015. Indigenous bacteria from the gut microbiota regulate  
504 host serotonin biosynthesis. *Cell* 161:264-76.



- 505 37. Psichas A, Sleeth ML, Murphy KG, Brooks L, Bewick GA, Hanyaloglu AC, Ghatei MA,  
506 Bloom SR, Frost G. 2015. The short chain fatty acid propionate stimulates GLP-1 and  
507 PYY secretion via free fatty acid receptor 2 in rodents. *Int J Obes (Lond)* 39:424-9.
- 508 38. Fischbach MA, Sonnenburg JL. 2011. Eating for two: how metabolism establishes  
509 interspecies interactions in the gut. *Cell Host Microbe* 10:336-47.
- 510 39. Vila G, Grimm G, Resl M, Heinisch B, Einwallner E, Esterbauer H, Dieplinger B,  
511 Mueller T, Luger A, Clodi M. 2012.  $\beta$ -type natriuretic peptide modulates ghrelin, hunger,  
512 and satiety in healthy men. *Diabetes* 61:2592-6.
- 513 40. Batterham RL, ffytche DH, Rosenthal JM, Zelaya FO, Barker GJ, Withers DJ, Williams  
514 SCR. 2007. PYY modulation of cortical and hypothalamic brain areas predicts feeding  
515 behaviour in humans. *Nature* 450:106-109.
- 516 41. Ramayo-Caldas Y, Mach N, Lepage P, Levenez F, Denis C, Lemonnier G, Leplat JJ,  
517 Billon Y, Berri M, Dore J, Rogel-Gaillard C, Estelle J. 2016. Phylogenetic network  
518 analysis applied to pig gut microbiota identifies an ecosystem structure linked with  
519 growth traits. *ISME J* 10:2973-2977.
- 520 42. Yang H, Huang X, Fang S, He M, Zhao Y, Wu Z, Yang M, Zhang Z, Chen C, Huang L.  
521 2017. Unraveling the fecal microbiota and metagenomic functional capacity associated  
522 with feed efficiency in pigs. *Front Microbiol* 8:1555.
- 523 43. Song S, Hooiveld GJ, Li M, Zhao F, Zhang W, Xu X, Muller M, Li C, Zhou G. 2016.  
524 Dietary soy and meat proteins induce distinct physiological and gene expression changes  
525 in rats. *Sci Rep* 6:20036.

- 526 44. Wang Q, Garrity GM, Tiedje JM, Cole JR. 2007. Naive Bayesian classifier for rapid  
527 assignment of rRNA sequences into the new bacterial taxonomy. *Appl Environ Microbiol*  
528 73:5261-7.
- 529 45. Schloss PD, Westcott SL, Ryabin T, Hall JR, Hartmann M, Hollister EB, Lesniewski RA,  
530 Oakley BB, Parks DH, Robinson CJ, Sahl JW, Stres B, Thallinger GG, Van Horn DJ,  
531 Weber CF. 2009. Introducing mothur: open-source, platform-independent,  
532 community-supported software for describing and comparing microbial communities.  
533 *Appl Environ Microbiol* 75:7537-41.
- 534 46. Lozupone C, Lladser ME, Knights D, Stombaugh J, Knight R. 2011. UniFrac: an  
535 effective distance metric for microbial community comparison. *ISME J* 5:169-72.
- 536 47. Segata N, Izard J, Waldron L, Gevers D, Miropolsky L, Garrett WS, Huttenhower C.  
537 2011. Metagenomic biomarker discovery and explanation. *Genome Biology* 12:R60.
- 538 48. Langille MG, Zaneveld J, Caporaso JG, McDonald D, Knights D, Reyes JA, Clemente JC,  
539 Burkepile DE, Vega Thurber RL, Knight R, Beiko RG, Huttenhower C. 2013. Predictive  
540 functional profiling of microbial communities using 16S rRNA marker gene sequences.  
541 *Nat Biotechnol* 31:814-21.

542

543

544

## Figure Legends

545

546 **Figure 1. Principal coordinate analysis (PCoA) and clustering analysis.** (A) 4 months. (B) 8  
547 months. (C) Two points at 4 and 8 months. Note: the MANOVA significance was also indicated:  
548 \*  $P < 0.05$ ; \*\*  $P < 0.01$ . C, casein; ES, emulsion-type sausage; DP, dry-cured pork; SP, stewed  
549 pork; CP, cooked pork; S, soy.

550

551 **Figure 2. Composition of gut microbiota.** (A) The phylum-level taxonomic composition of  
552 fecal microbiota at 4 months. (B) The phylum-level taxonomic composition of fecal microbiota  
553 at 8 months. (C) Effects of feeding time on the phylum level abundance of 16S rRNA gene  
554 sequences. (D) The genus-level taxonomic composition of fecal microbiota at 4 months. (E) The  
555 genus-level taxonomic composition of fecal microbiota at 8 months. (F) Effects of feeding time  
556 on the genus level abundance of 16S rRNA gene sequences. Note: pie charts show the  
557 composition of fecal microbiota at the phylum level. Bray–Curtis similarity cluster analysis  
558 shows the similarity and difference of microbial composition in multiple samples. The  
559 significance is also indicated: \*  $P < 0.05$ ; \*\*  $P < 0.01$ .

560

561 **Figure 3. Effects of different protein diets on the top 20 microbial genera.** (A) Microbial  
562 relative abundance in response to six protein diets at 4 months. (B) Microbial relative abundance  
563 in response to six protein diets at 8 months. Note: the data were analyzed by one-way analysis of  
564 variance (ANOVA) and means were compared by the procedure of Duncan's multiple-range

565 comparison. The “a, b, c” means with different letters differed significantly ( $P < 0.05$ ), and the  
566 microbial genera of significant differences are presented in the figure.

567

568 **Figure 4. Linear discriminant analysis of fecal microbiota.** (A) 4 months. (B) 8 months. (C)

569 Two points at 4 and 8 months. Note: the left histogram shows the LDA scores computed for

570 features at the OTU level. The right heat map shows the relative abundance of OTU

571 (log<sub>10</sub>-transformed). Each column represents one animal and each row represents the OTU

572 corresponding to the left one. The color intensity scale shows the relative abundance of the OTU

573 (log<sub>10</sub>-transformed); yellow denotes a high relative abundance of the OTU while black denotes a

574 low relative abundance of the OTU. C, casein; ES, emulsion-type sausage; DP, dry-cured pork;

575 SP, stewed pork; CP, cooked pork; S, soy.

576

577 **Figure 5. Functional prediction of the microbial genes.** (A) 4 months. (B) 8 months. (C) Two

578 points at 4 and 8 months. Note: the data were analyzed by statistical analysis of taxonomic and

579 functional profiles (STAMP) and one-way analysis of variance (ANOVA); means were

580 compared by the procedure of Duncan’s multiple-range comparison. The “a, b, c” means with

581 different letters differed significantly ( $P < 0.05$ ), and the biological function of significant

582 differences are presented in the figure.

583

584 **Figure 6. Variations in signaling molecules of the gut–brain axis.** (A) 4 months. (B) 8 months.

585 Note: the data were analyzed by one-way analysis of variance (ANOVA) and means were

586 compared by the procedure of Duncan's multiple-range comparison. The "a, b, c" means with  
587 different letters differed significantly ( $P < 0.05$ ).

588

589 **Figure 7. Key species associated with signaling molecules of the gut–brain axis.** (A) 4  
590 months. (B) 8 months. Note: each figure has four parts: (1) the large heat map, correlations  
591 between microbiota and signaling molecules, where green represents significant positive  
592 correlation and red represents significant negative correlation; (2) the bottom bars represent  
593 rich/poor groups of signaling molecules; (3) the right bars next to the large heat map represent  
594 rich/poor groups of different microbial OTU-level taxa; (4) the independent right color bars  
595 depict correlation coefficients between microbiota and signaling molecules. OTUs whose relative  
596 abundance is at least 0.5% in at least one group were analyzed; significantly related OTUs are  
597 shown in the figures. The significance is also indicated: \*  $P < 0.05$ ; \*\*  $P < 0.01$ ; \*\*\*  $P < 0.001$ . C,  
598 casein; ES, emulsion-type sausage; DP, dry-cured pork; SP, stewed pork; CP, cooked pork; S,  
599 soy; R, rich group; P, poor group.

600

601 **Figure 8. Co-occurrence network of the key species.** (A) 4 months. (B) 8 months. Note: nodes  
602 represent the OTUs identified by correlation analysis, and the size of the node corresponds to the  
603 relative abundance of the OTUs or genera. Each pair of OTUs or genera showing a Spearman  
604 correlation coefficient value higher than 0.6 is linked with a connecting line whose thickness  
605 corresponds to the coefficient values. The green line represents significant positive correlation  
606 while the red line represents significant negative correlation.

607

608 **Figure 9. Growth performance.** (A) Body weight during feeding. (B) Daily body weight gain.

609 (C) Daily feed intake. (D) Feed conversion efficiency. (E) Absolute weight of epididymal

610 adipose tissue. (F) Relative weight of epididymal adipose tissue to body weight. (G) Absolute

611 weight of liver. (H) Relative weight of liver to body weight. Note: the data at each feeding time

612 point were analyzed by one-way analysis of variance (ANOVA) and means were compared by

613 the procedure of Duncan's multiple comparison. The asterisks (\*) indicate significant differences

614 between diet groups. \*  $P < 0.05$ ; \*\*  $P < 0.01$ . The "a, b, c" means with different letters differed

615 significantly ( $P < 0.05$ ). ADG, average daily gain; ADFI, average daily feed intake; FCE, feed

616 efficiency; EATW, absolute weight of epididymal adipose tissue; EATI, relative weight of

617 epididymal adipose tissue to body weight; LW, absolute weight of liver; LI, relative weight of

618 liver to body weight.

619

620 **Table 1. Richness and diversity indices of fecal microbiota.**

| Diet groups           | 0.97                       |                            |                         |           |
|-----------------------|----------------------------|----------------------------|-------------------------|-----------|
|                       | Chao                       | ACE                        | Shannon                 | Simpson   |
|                       | 4 months                   |                            |                         |           |
| Casein                | 295.89±24.82 <sup>b</sup>  | 294.50±15.43 <sup>c</sup>  | 3.87±0.29               | 0.04±0.01 |
| Emulsion-type sausage | 314.40±12.76 <sup>ab</sup> | 314.40±11.73 <sup>ab</sup> | 3.56±0.13               | 0.07±0.02 |
| Dry-cured pork        | 320.92±14.39 <sup>a</sup>  | 315.25± 7.87 <sup>ab</sup> | 3.79±0.34               | 0.06±0.03 |
| Stewed pork           | 297.55±10.20 <sup>b</sup>  | 299.63± 8.48 <sup>bc</sup> | 3.84±0.29               | 0.05±0.03 |
| Cooked pork           | 325.64±16.04 <sup>a</sup>  | 322.61±19.21 <sup>a</sup>  | 3.71±0.27               | 0.06±0.02 |
| Soy                   | 323.56±17.18 <sup>a</sup>  | 324.73±14.10 <sup>a</sup>  | 4.01±0.32               | 0.04±0.01 |
|                       | 8 months                   |                            |                         |           |
| Casein                | 282.51±30.73 <sup>b</sup>  | 277.08±30.53 <sup>b</sup>  | 3.68±0.21 <sup>ab</sup> | 0.06±0.02 |
| Emulsion-type sausage | 299.34±18.07 <sup>b</sup>  | 296.86±19.80 <sup>b</sup>  | 3.56±0.46 <sup>b</sup>  | 0.09±0.04 |
| Dry-cured pork        | 300.11±20.63 <sup>b</sup>  | 298.34± 6.89 <sup>b</sup>  | 3.43±0.22 <sup>b</sup>  | 0.08±0.02 |
| Stewed pork           | 302.66±8.64 <sup>b</sup>   | 299.19± 7.92 <sup>b</sup>  | 3.51±0.17 <sup>b</sup>  | 0.07±0.02 |
| Cooked pork           | 285.47±16.90 <sup>b</sup>  | 284.03±13.87 <sup>b</sup>  | 3.45±0.30 <sup>b</sup>  | 0.07±0.03 |
| Soy                   | 355.57±16.91 <sup>a</sup>  | 350.82±14.57 <sup>a</sup>  | 4.03±0.33 <sup>a</sup>  | 0.04±0.02 |
| Time points           |                            |                            |                         |           |
| 4 months              | 313.53±19.42               | 312.27±16.73               | 3.80±0.29 <sup>a</sup>  | 0.06±0.02 |
| 8 months              | 305.03±30.15               | 301.88±28.46               | 3.61±0.35 <sup>b</sup>  | 0.07±0.03 |

621 Values are shown as mean ± SD, and results are considered significant when  $P < 0.05$ .

A

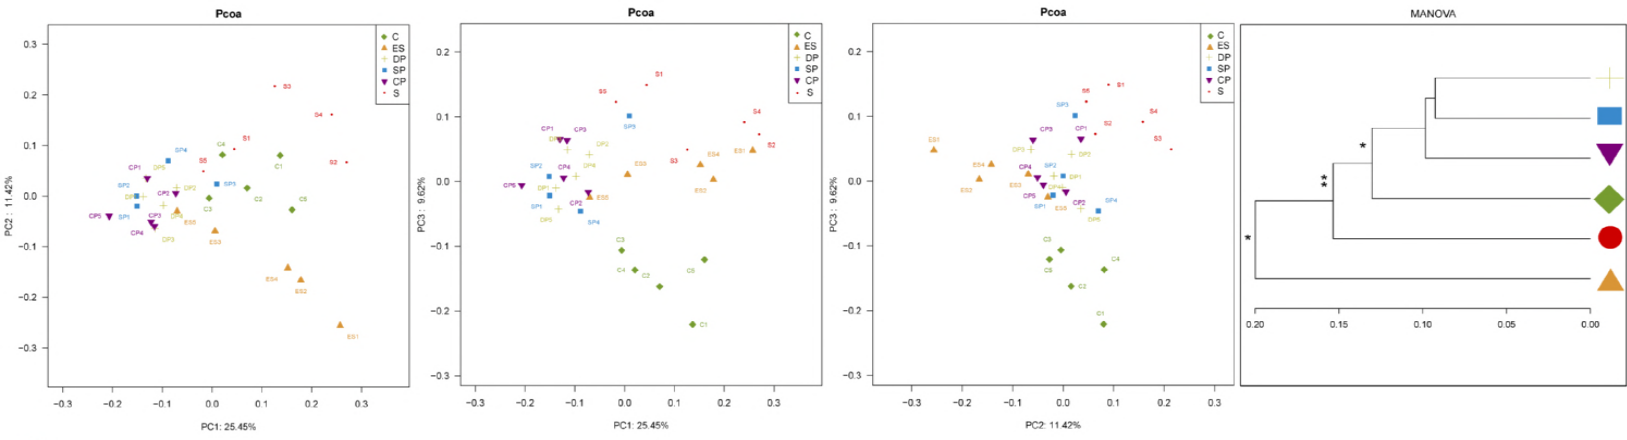

B

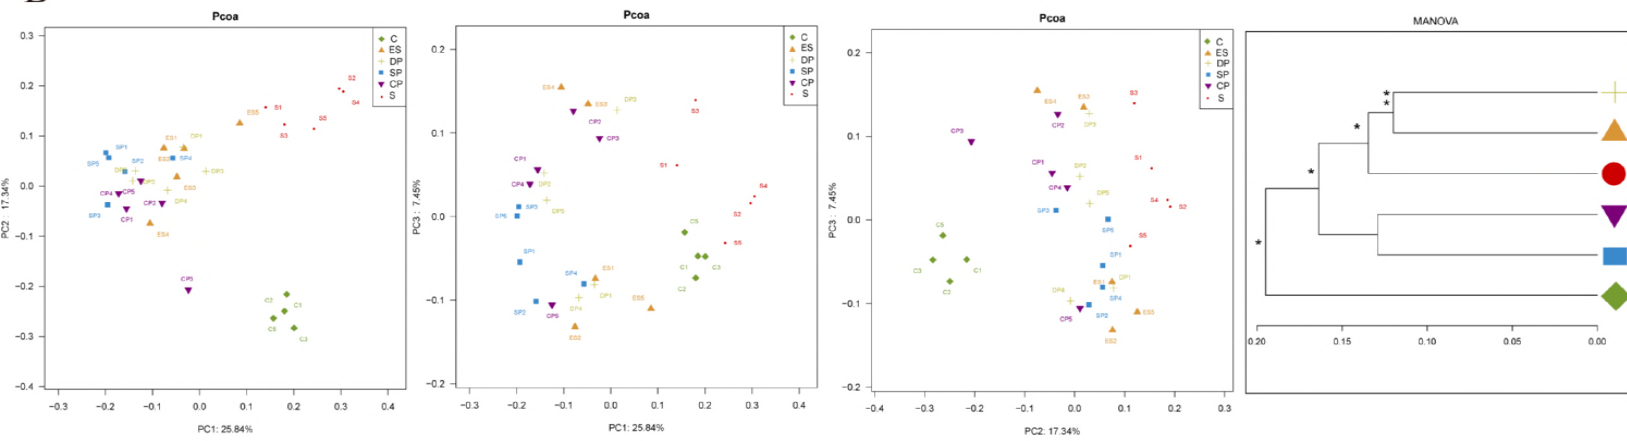

C

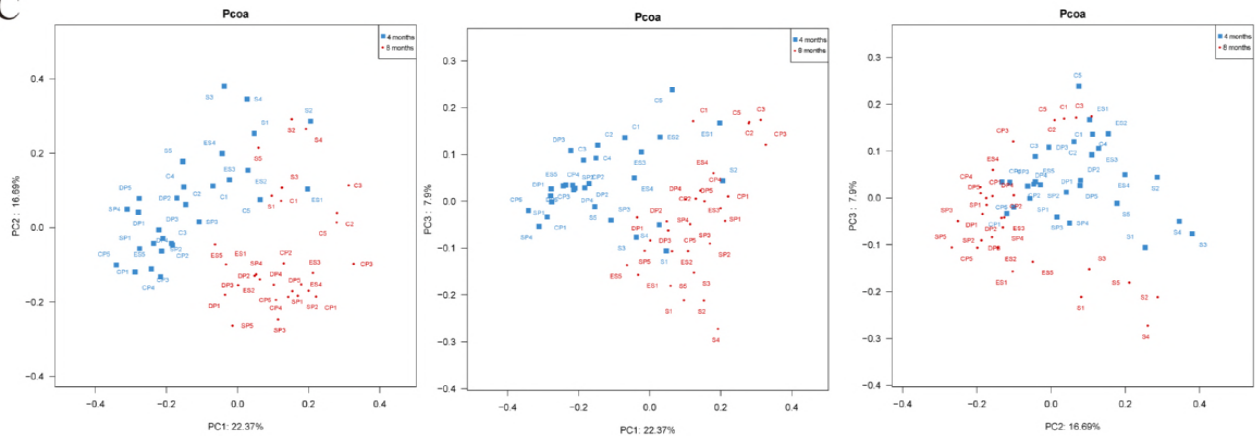



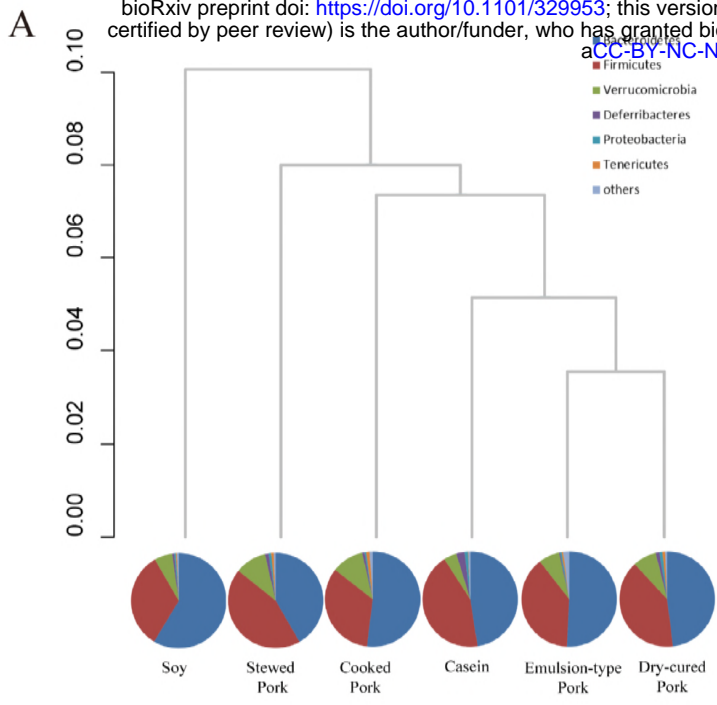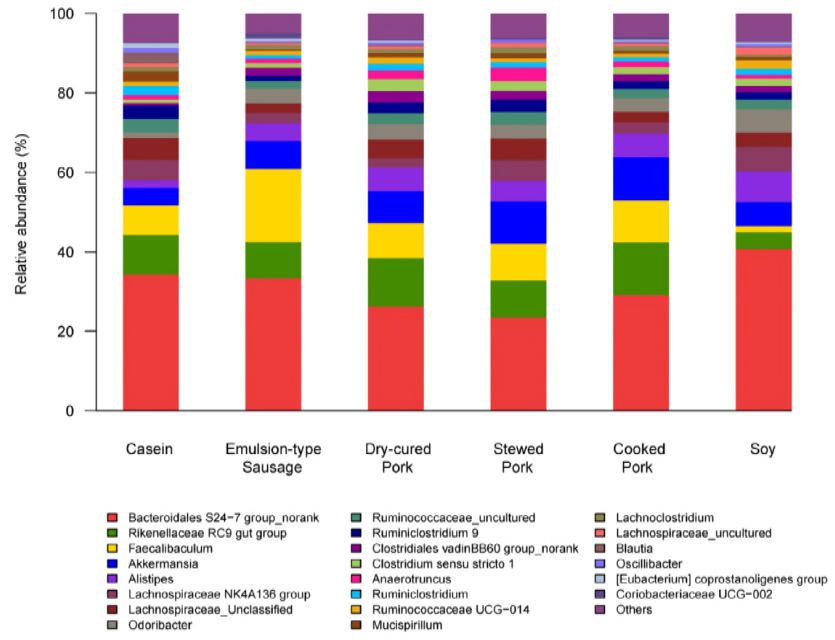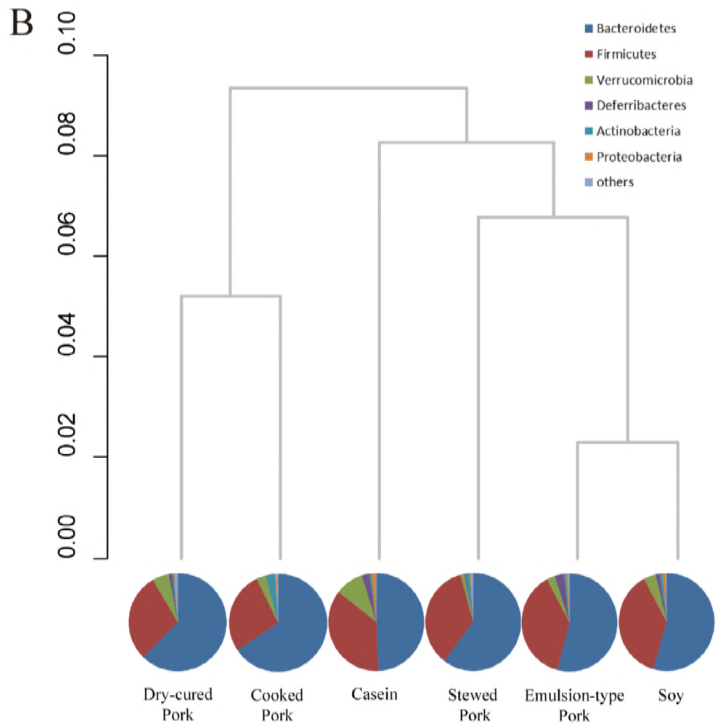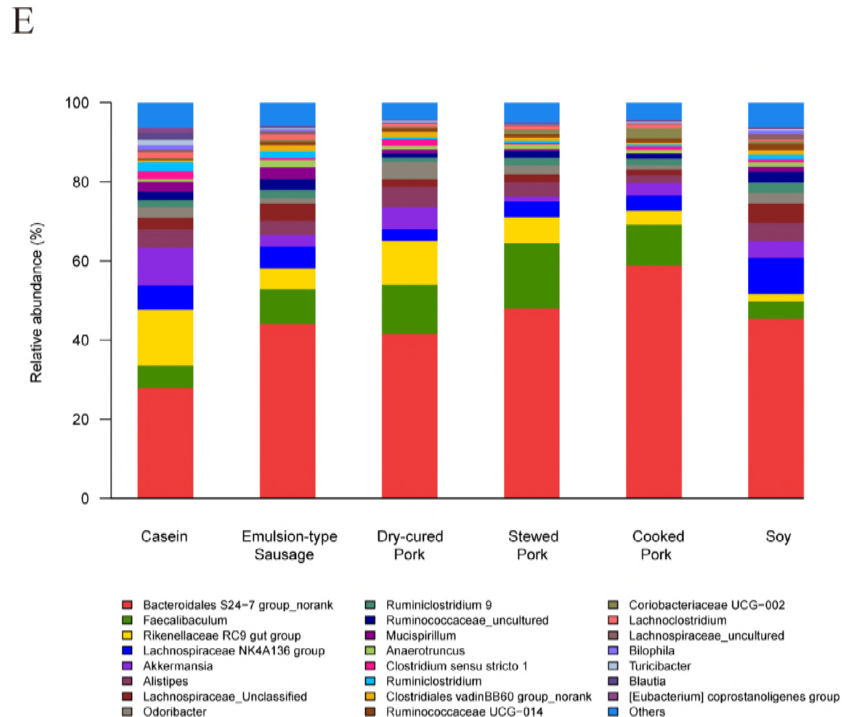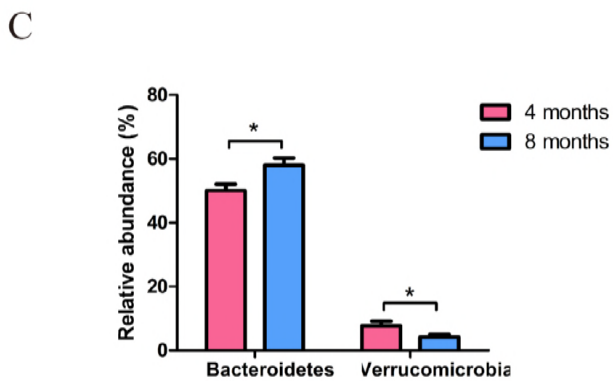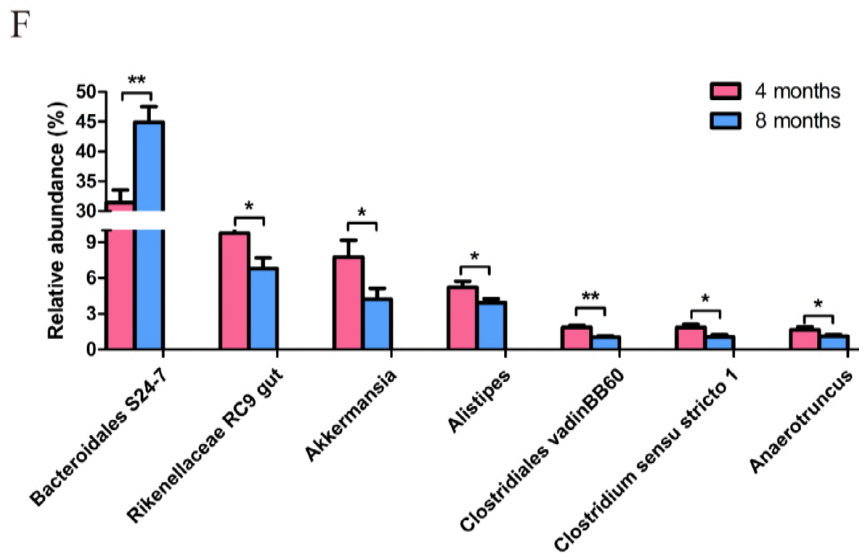

A

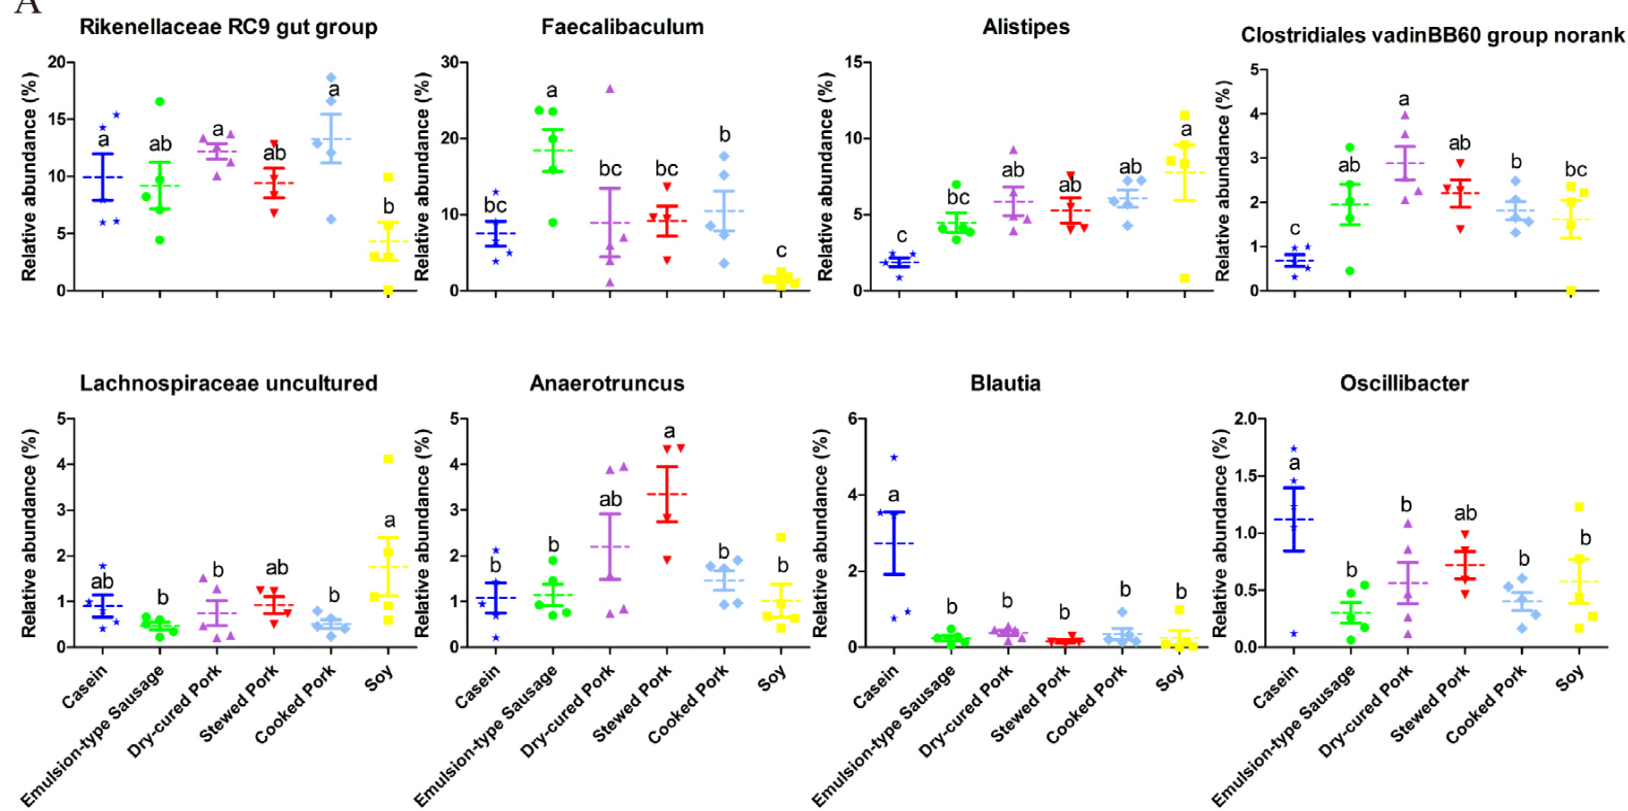

B

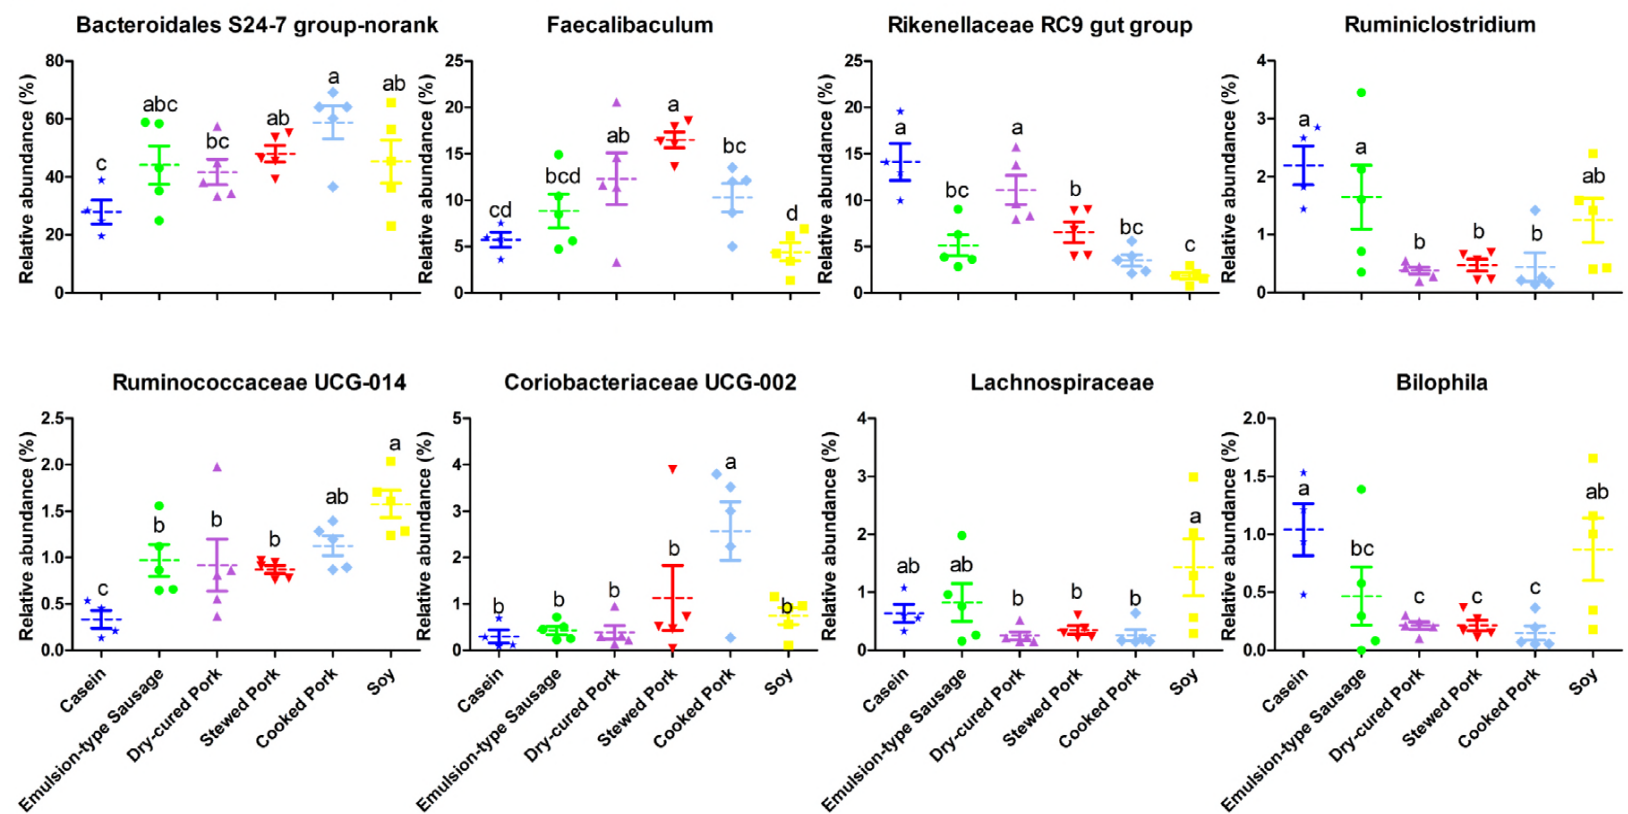

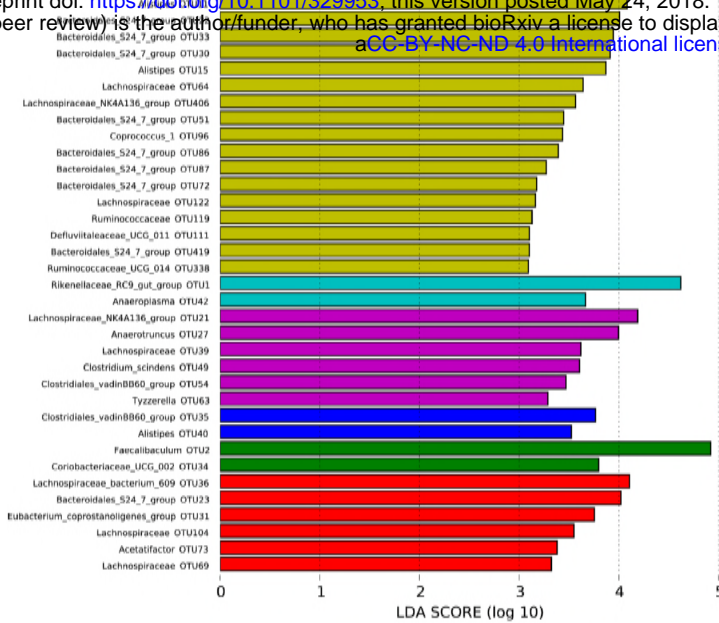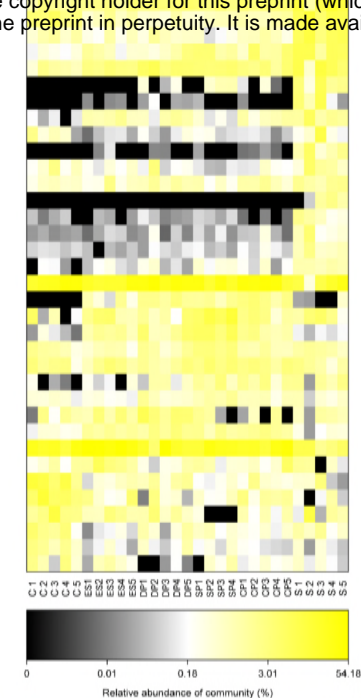

B

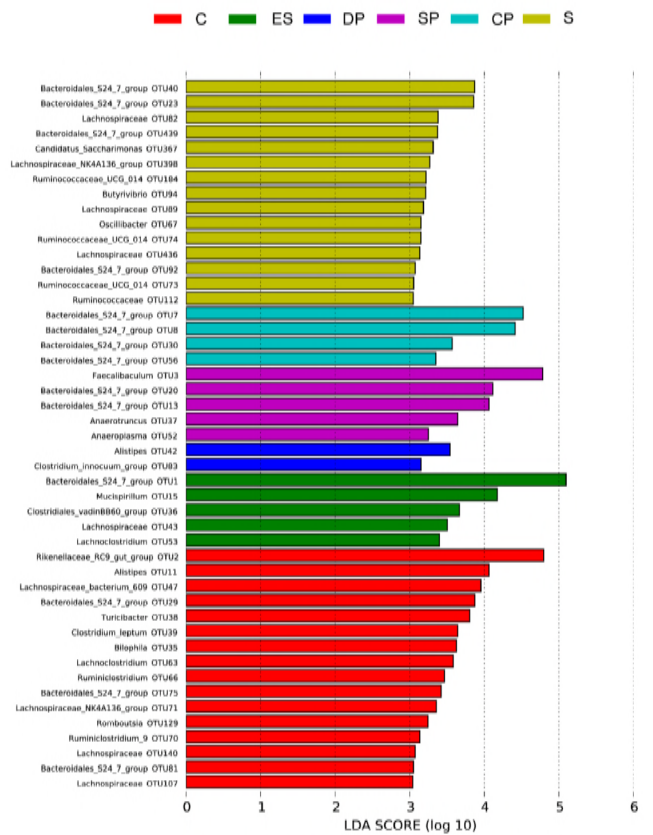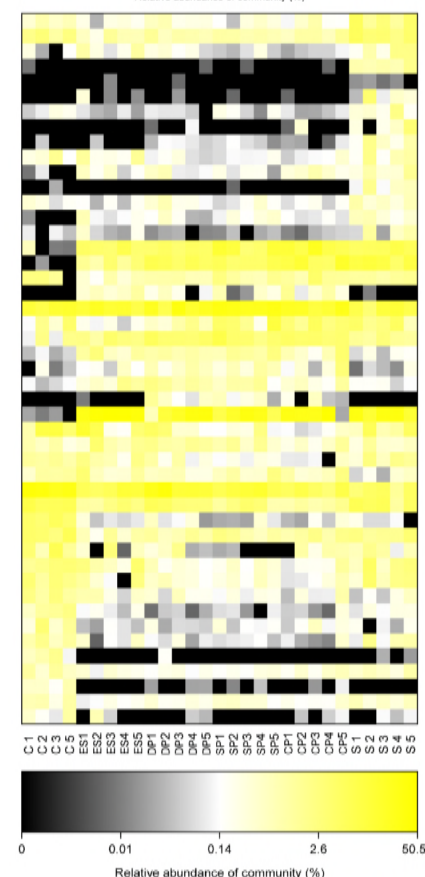

C

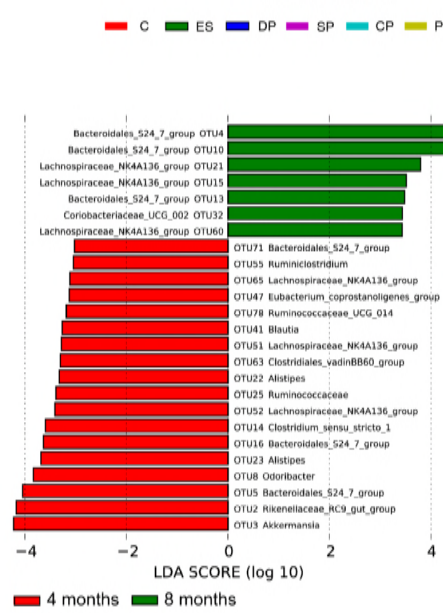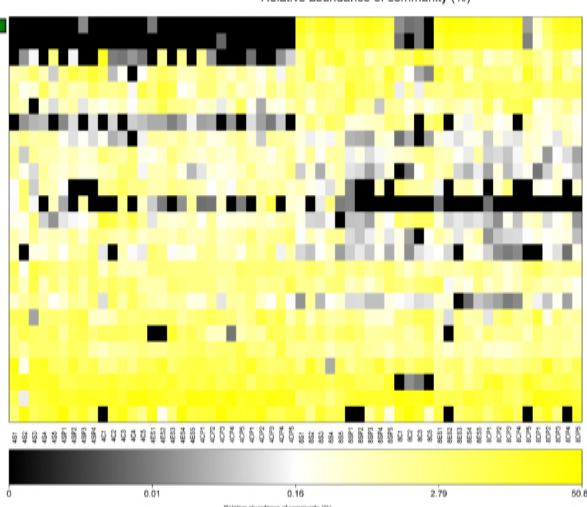

4 months 8 months

A

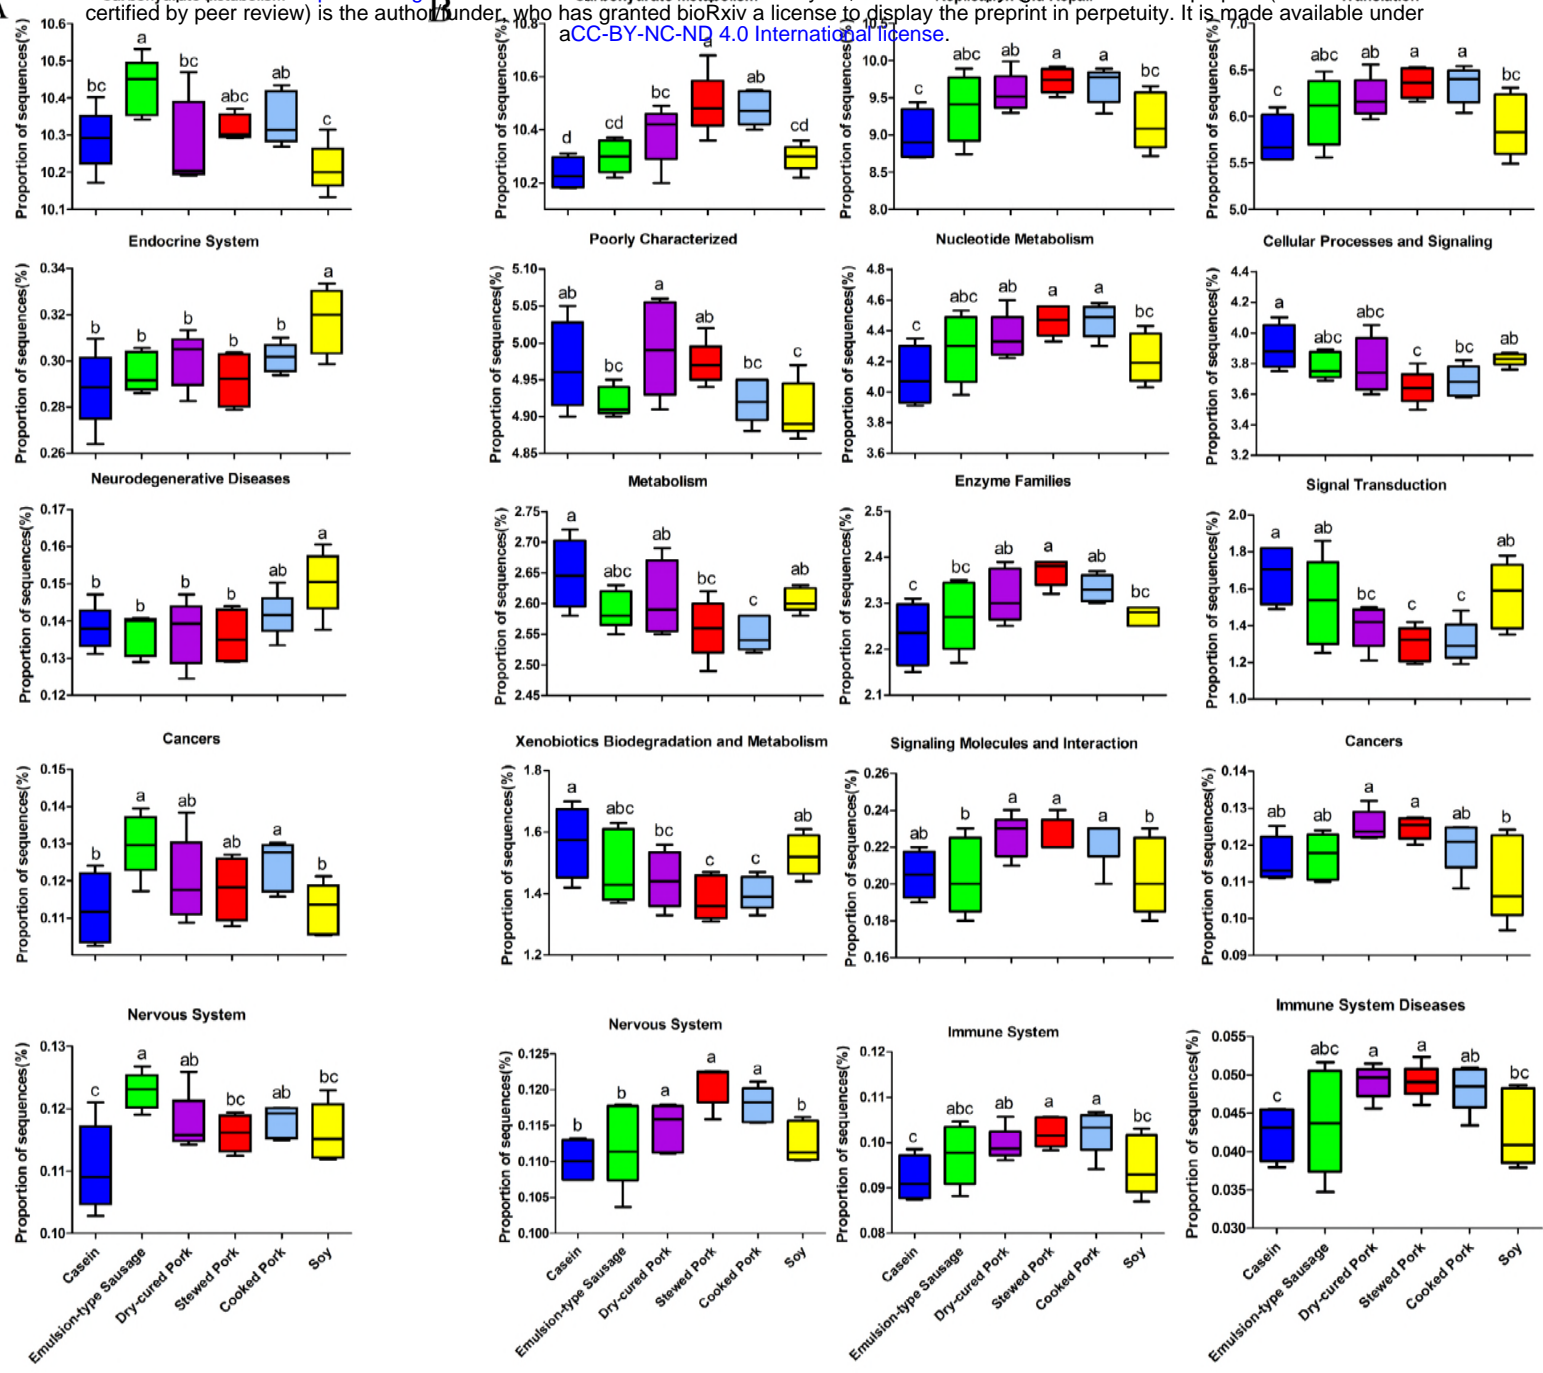

C

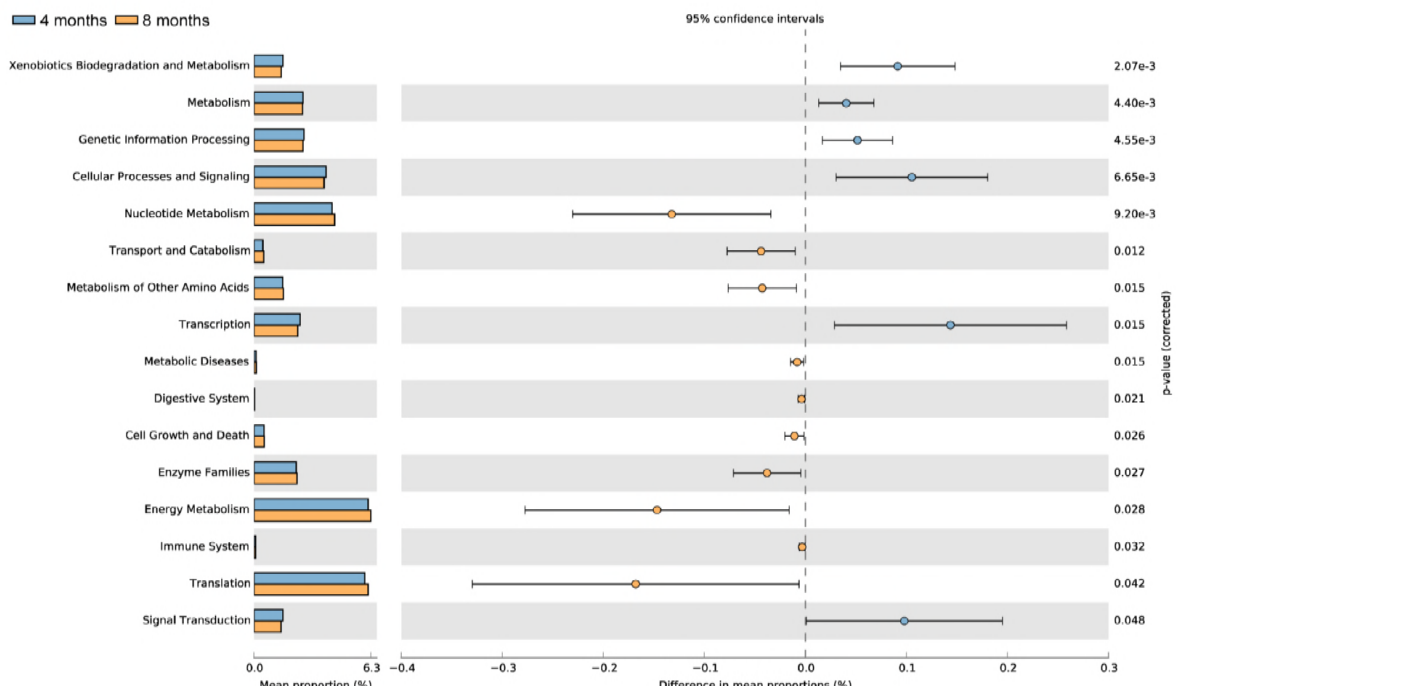

A

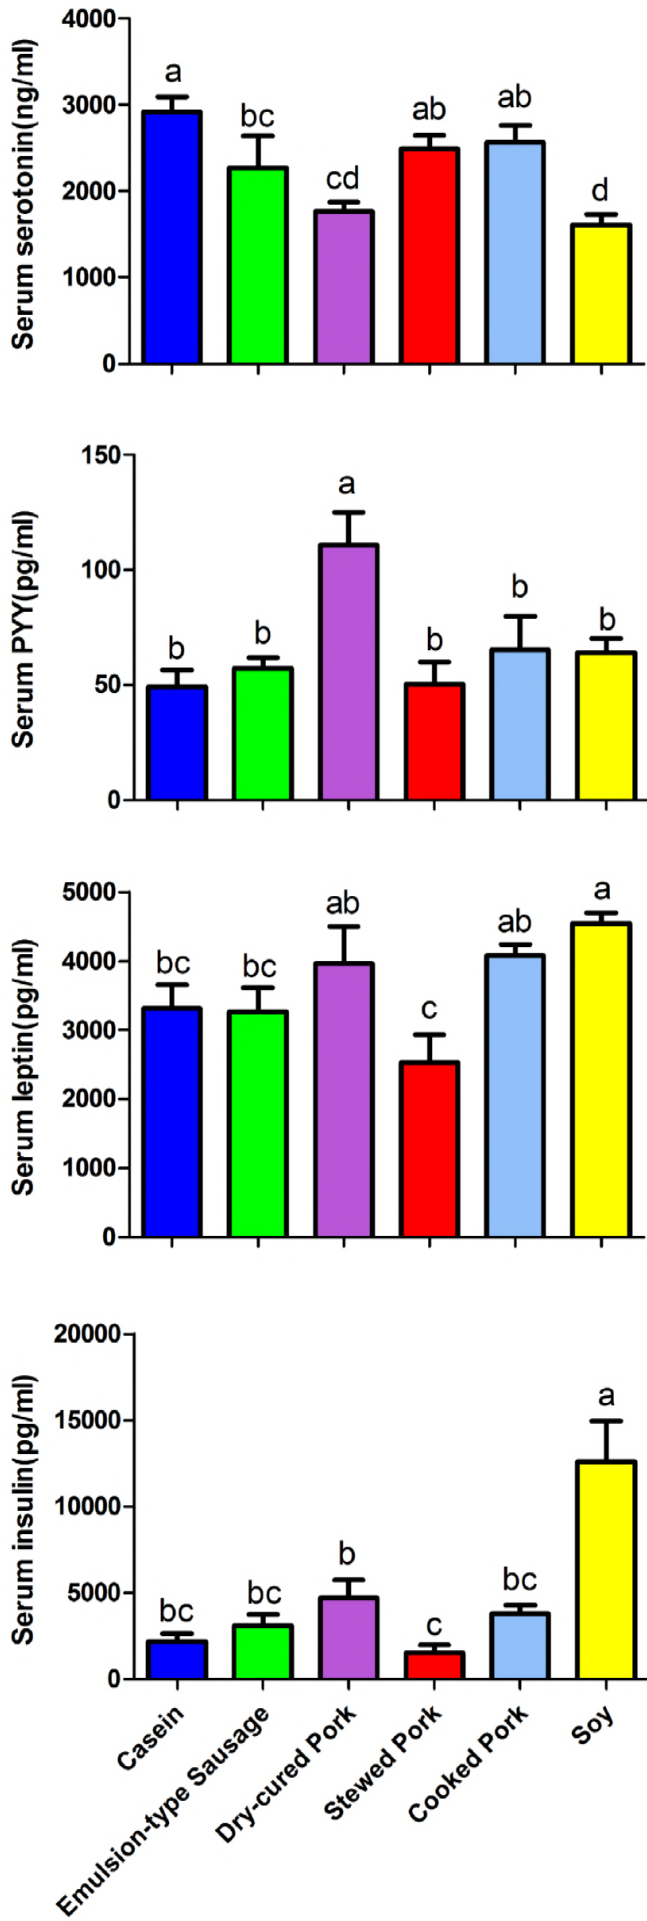

B

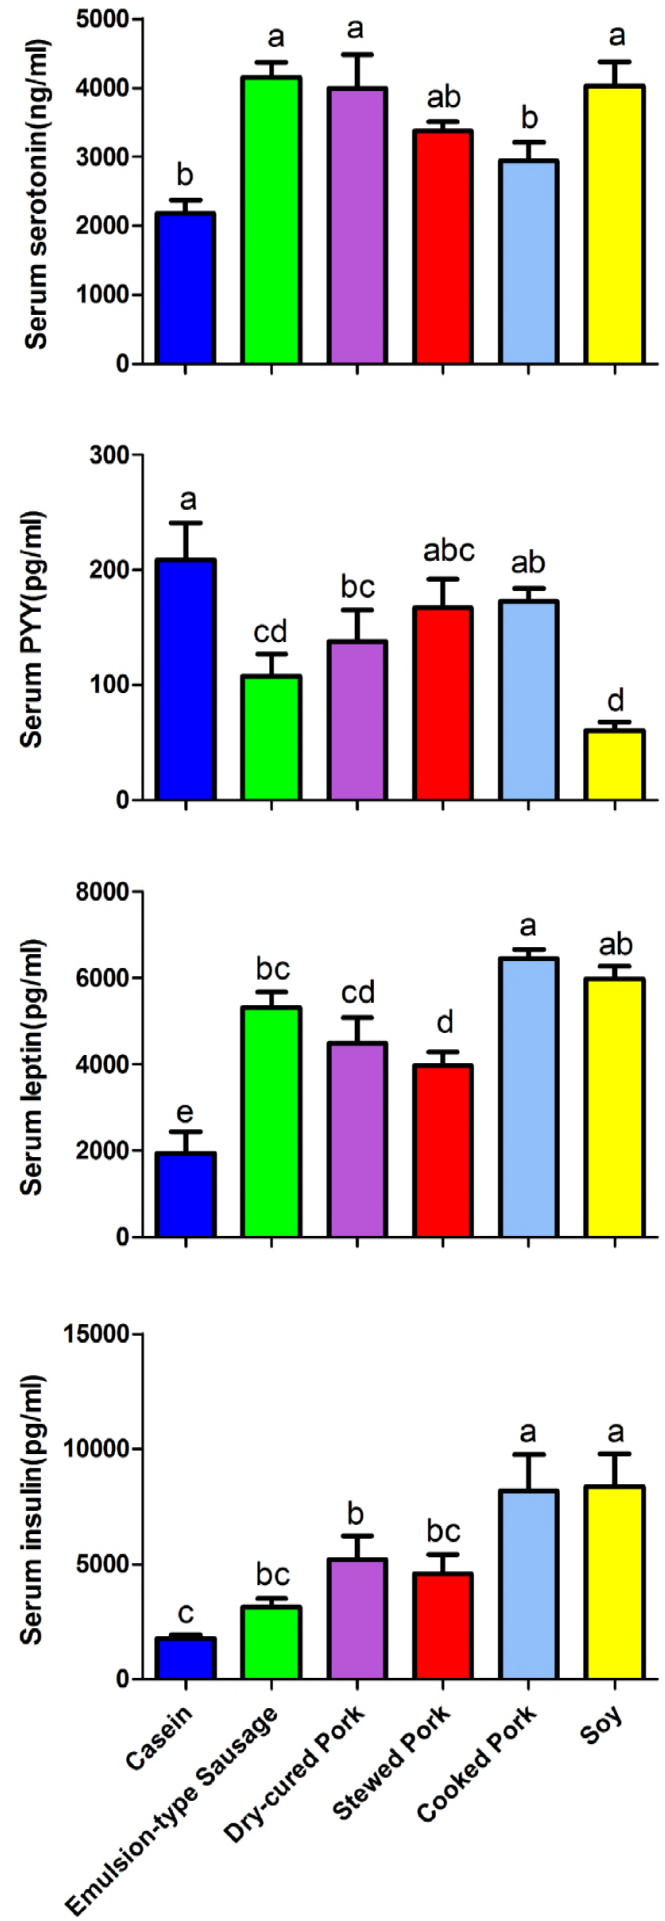

A

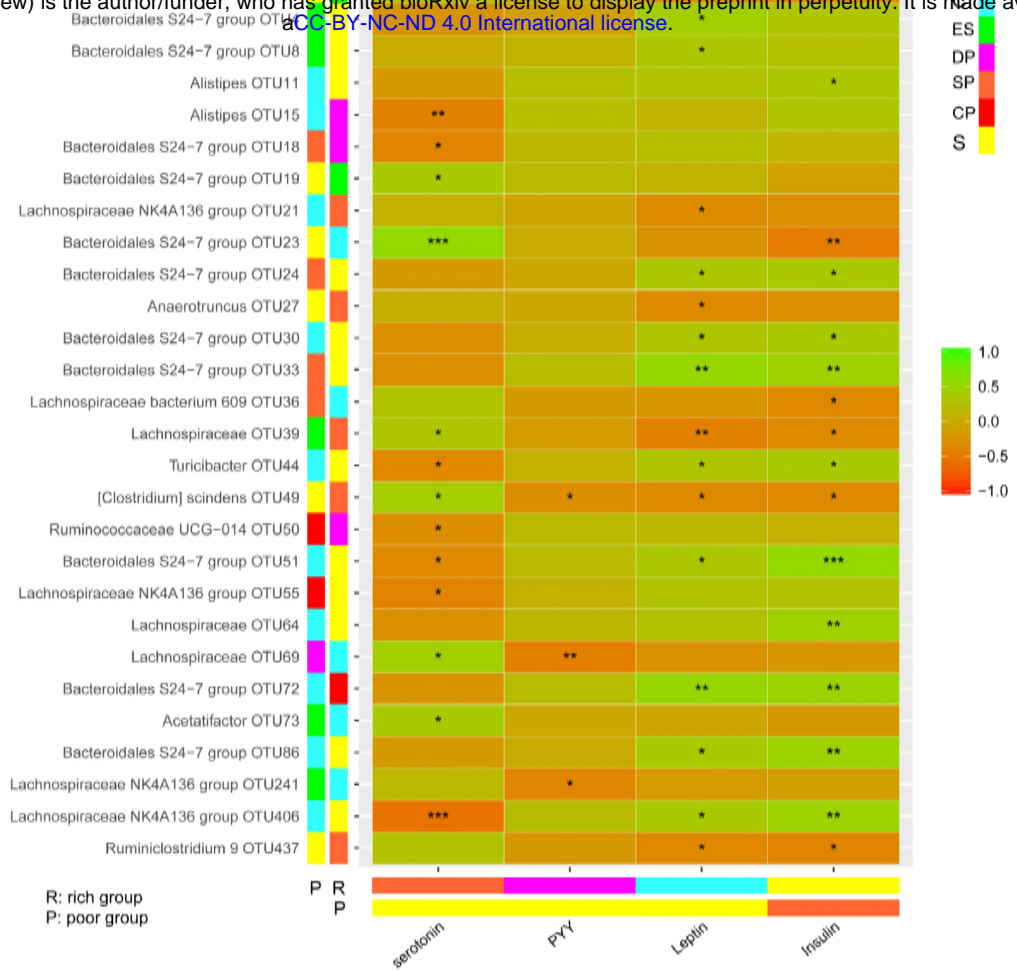

B

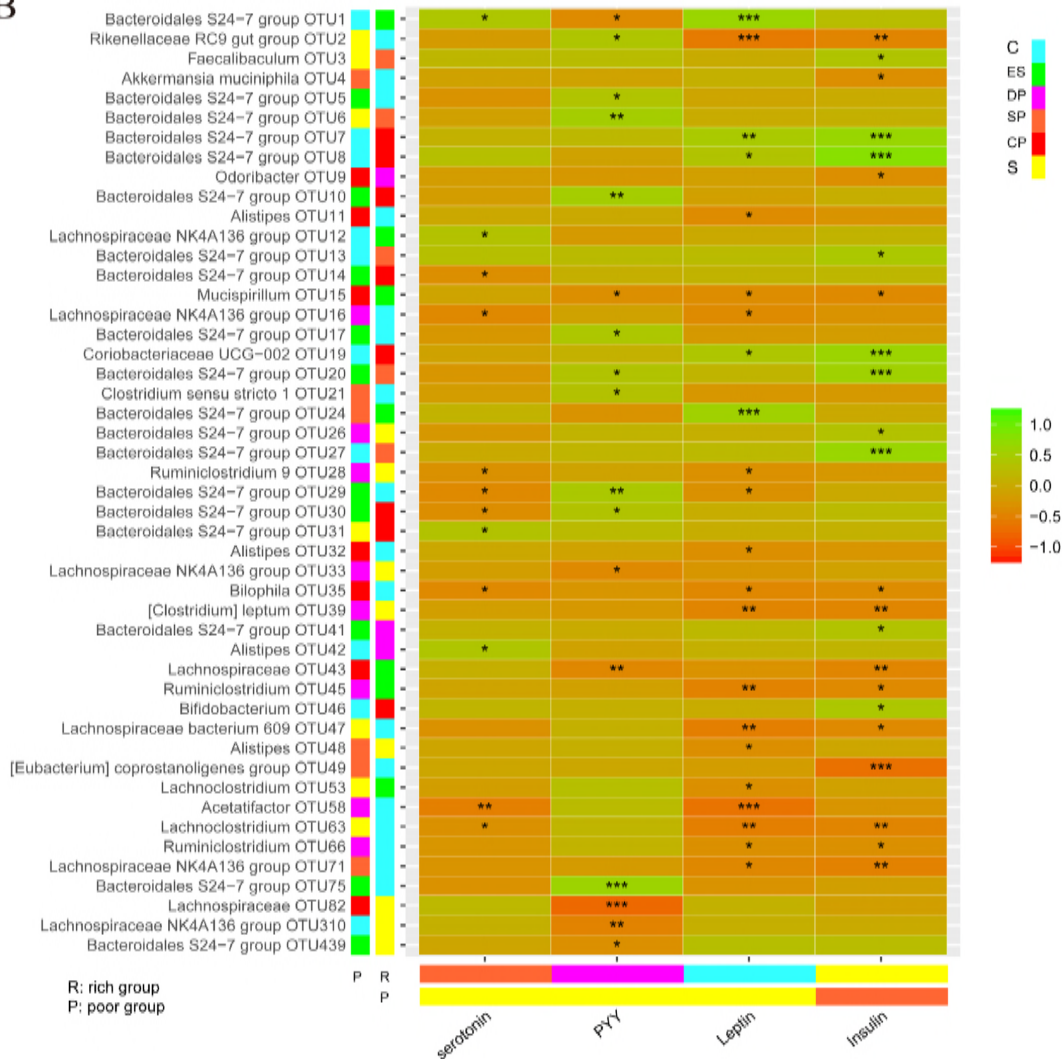

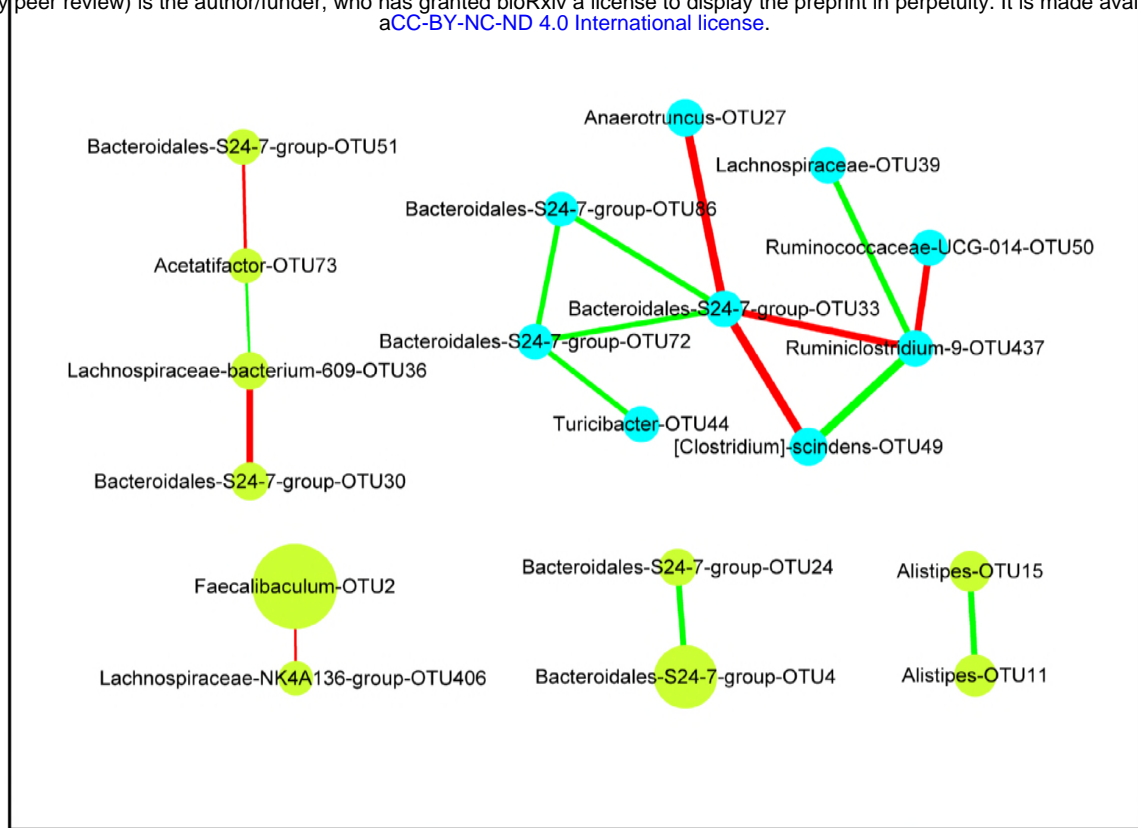

B

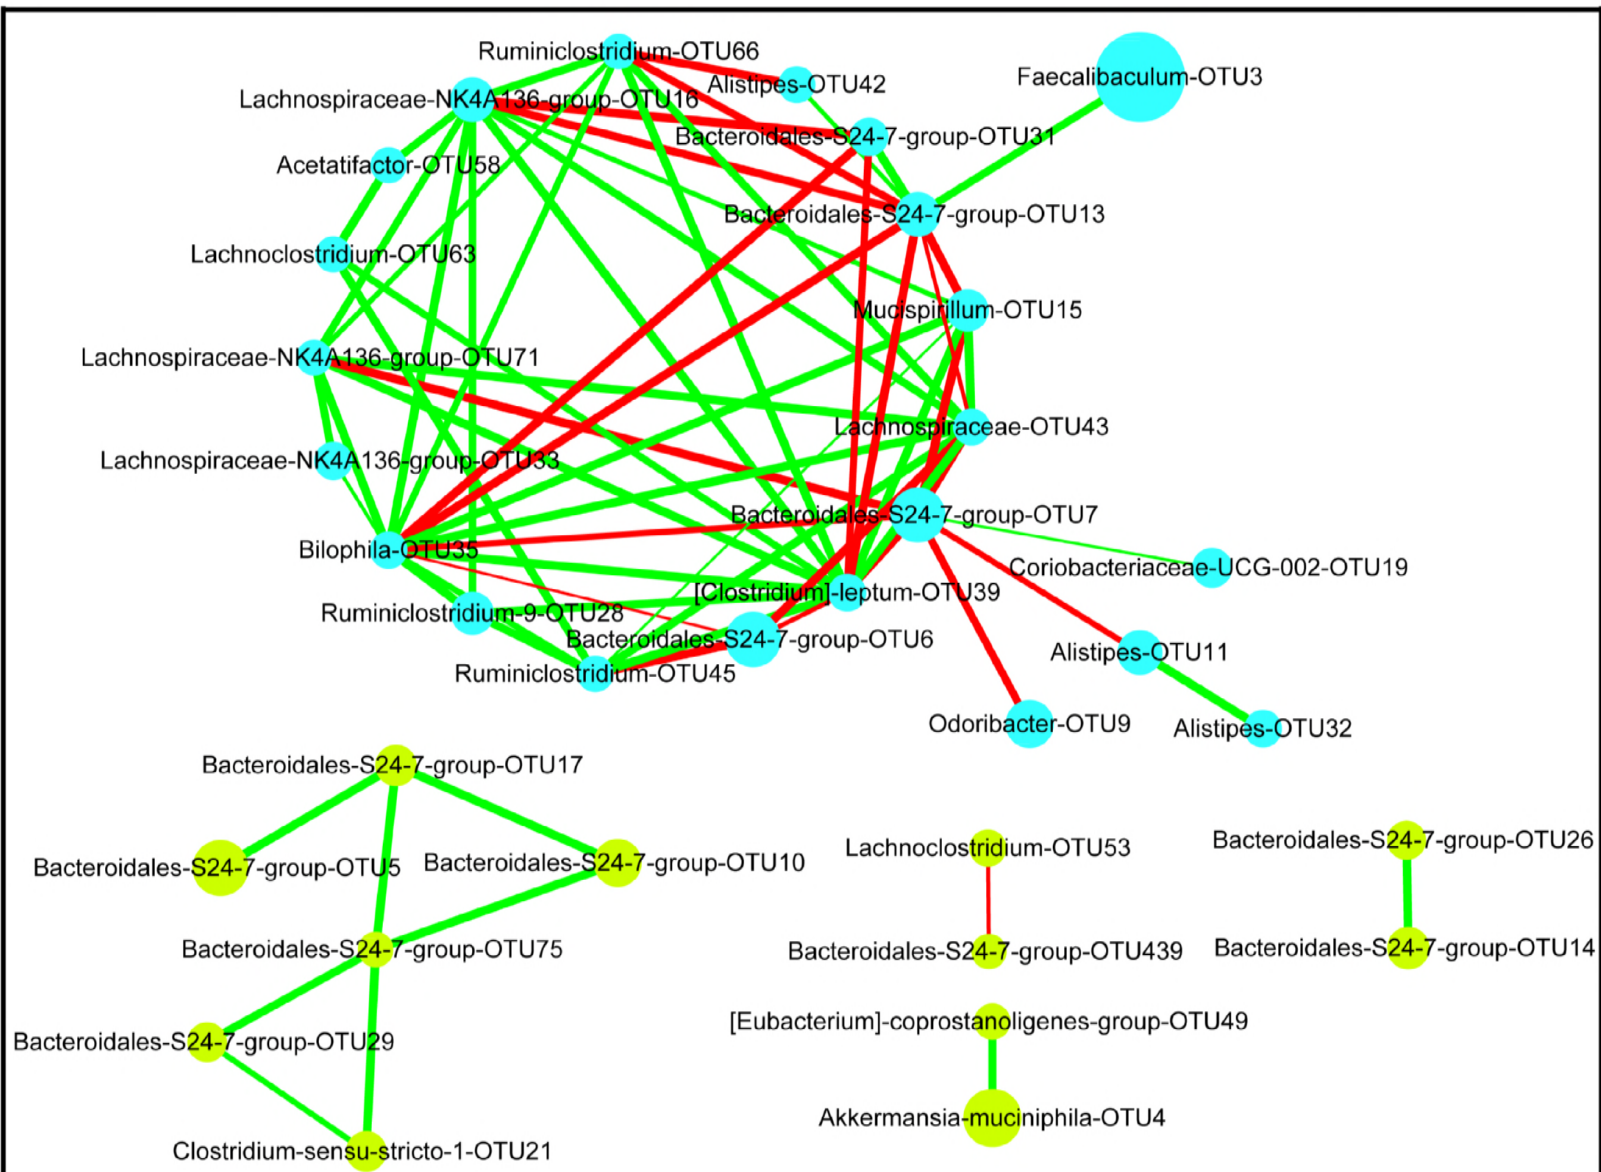

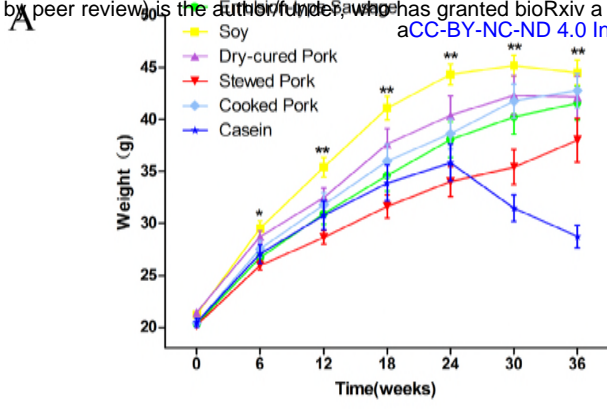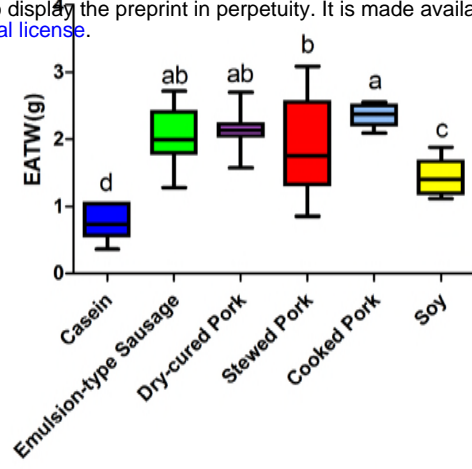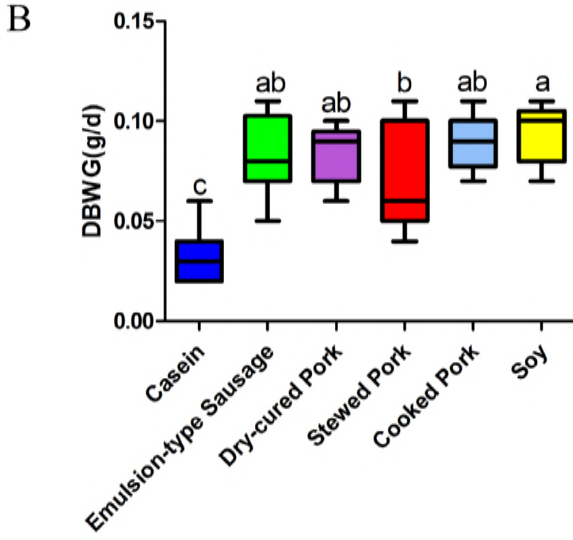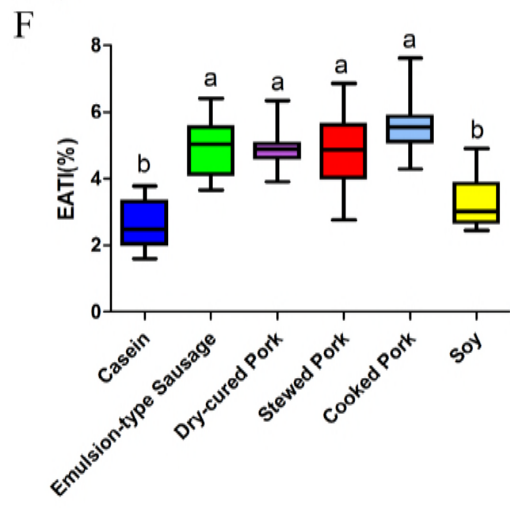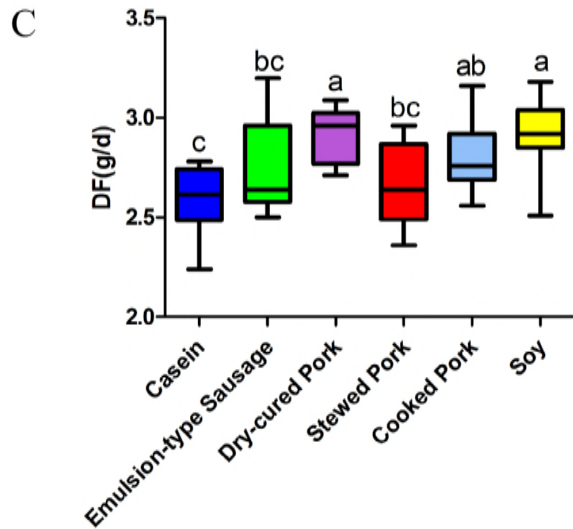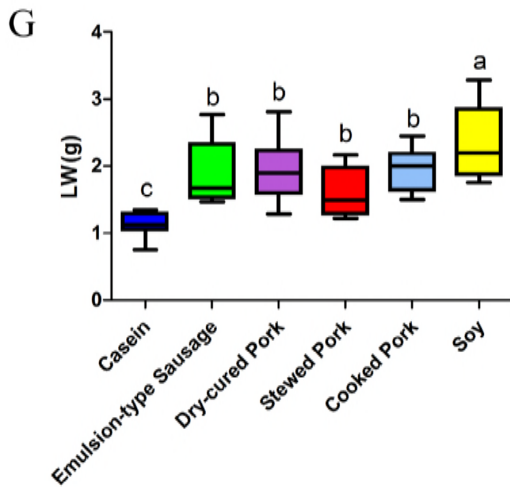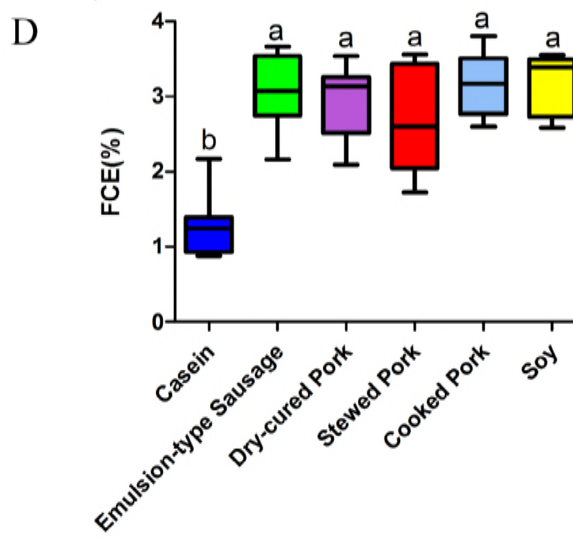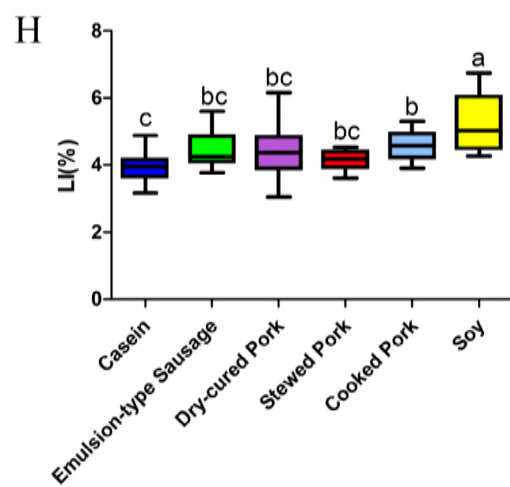

Source: http://biorxiv.org/content/10.1101/329953v1.full.pdf
